# Supplementary material
Source: MDPI journal article supplement (https://www.mdpi.com/1424-2818/15/1/52)
Supplement: s1 [file s1]

# List of references to sources containing information on dormice in the diet of predators in Europe

1. Adánez AV (2000) Análisis comparativo de la dieta de ambos sexos en el cárabo común *Strix aluco* en la Península Ibérica. *Ardeola* 47:203–213
2. Agnelli, P., and Marinis, A.M. 1993. Comparison between barn owl pellet and fox scat analysis in small mammal survey. *Hystrix*, 4: 65–68.
3. Alegre, J., Hernández, A., Sánchez, A. J. (1989). Datos sobre la dieta invernal del búho chico (*Asio otus*) en la provincia de León. Doñana, Acta Vertebrata, 16 (2): 305-309.
4. Alivizatos H, Goutner V, Zogaris S. 2005. Contribution to the study of the diet of four owl species (Aves, Strigiformes) from mainland and island areas of Greece. *Belgian Journal of Zoology* 135: 109–118.
5. Aloise & Contoli, unpublished – cited in Scaraveli & Aloise (1994), page 250.
6. Aloise, G., Pelosi, M. & Ronca, M. 1990. Small mammal communities of the 'Monte Rufeno' natural reserve (Latium, Italy): data from barn owl *Tyto alba* pellets. *Hystrix* 2:23–34
7. Aloise G., Contoli L. & Miccinilli F. 1993. Scientific use of small mammal collection from owl pellets. In: Palacios F., Martinez C. & Thomas B.(eds.), Int. Symp. & First World Congress on Preserv. and Conserv. Nat. Hist. Collections., Madrid, vol.1: 91–105.
8. Amori G., Cantini M., Rota V., 1994. Distribution and conservation of the Italian dormice. *Hystrix*, 6: 331-336
9. Amori G., Rizzo Pinna V., Sammuri G., Luiselli L., 2015. Diversity of small mammal communities of the Tuscan Archipelago: testing the effects of island size, distance from mainland, and human density. *Folia Zoologica* 64: 161–166
10. Andresi P., Sodor M. 1986. Adatok fészkelő bagolyfajaink táplálkozásökológiájához. - MME II. Tudományos Ülése, Szeged, pp. 293-300.
11. Angermann R. 1963. Zur Ökologie und Biologie des Baumschläfers, *Dryomys nitedula* (Pallas, 1779) in der Waldsteppenzone. *Acta Theriologica*, 7 (18): 333–367.
12. Antón, M. G., Pérez-García, J. M., Botella, F., Sánchez-Zapata, J. A. (2008). Dieta del Búho Real (*Bubo bubo*) en el sur de la provincia de Alicante. Pp. 165-170. En: García Moreno, P. (Coord.). Actas Cuarto Congreso de la Naturaleza de la Región de Murcia y Primero del Sureste Ibérico. Murcia, 19 al 21 de Noviembre de 2008. Asociación de Naturalistas de Sureste, Murcia. 360 pp.
13. Apostolico F, Vercillo F, La Porta G, Ragni B (2016) Long-term changes in diet and trophic niche of the European wildcat (*Felis silvestris silvestris*) in Italy. *Mammal Research* 61: 109–119.
14. Arcà G., 1980 Regime alimentare dell'Allocco nel Lazio. *Avocetta*, 4: 3-15
15. Arroyo, B. (1980). La alimentación del milano negro (*Milvus migrans*) en una localidad de España central. *Ardeola*, 25: 47-58.
16. Asprea, A., & De Marinis, A. M. (2005). The diet of the badger *Meles meles* (Mustelidae, Carnivora) on the Apennines (Central Italy). *Mammalia*, 69, 89–95.

17. Bakaloudis D.E., Vlachos C.G. & Papakosta M.A. 2012: Diet composition and feeding strategies of the stone marten (*Martes foina*) in a typical mediterranean ecosystem. Scientific World J. doi: 10.1100/2012/163920.
18. Balčiauskienė, L. 2005. Analysis of Tawny Owl (*Strix aluco*) food remains as a tool for long-term monitoring of small mammals. Acta Zoologica Lituanica 15 (2): 85-89.
19. Balčiauskienė L. & Balčiauskas L. 2008. Common dormouse as a prey item of breeding tawny owls in five districts of Lithuania. Acta Zoologica Lituanica, 18: 58–62.
20. Balčiauskienė L., Dementavičius D. 2006. Habitat determination of Tawny Owl (*Strix aluco*) prey composition during breeding period. Acta Biol. Univ. Daugavpil., 6 (1-2): 1-12.
21. Balčiauskienė, L., Juškaitis, R. & Naruševičius, V. 2000. Small mammals in the diet of the tawny owl (*Strix aluco*) in central Lithuania. Folia Theriologica Estonica 5: 15-26.
22. Balčiauskienė, L., Juškaitis, R. and Lopeta, V. 2000–2001. Investigations on the tawny owl diet in the Kurtuvėnai regional park. Kurtuva. The Chronicle of Kurtuvėnai Regional Park 6.7: 30-35.
23. Balčiauskienė L., Juškaitis R. & Atkočaitis O. 2005. The diet of the tawny owl (*Strix aluco*) in south-western Lithuania during the breeding period. Acta Zoologica Lituanica, 15: 13–20.
24. Balčiauskienė, L., Jovaišas, A., Naruševičius, V., Petraška, A. and Skuja, S. 2006. Diet of Tawny Owl (*Strix aluco*) and Long-eared Owl (*Asio otus*) in Lithuania as found from pellets. Acta Zoologica Lituanica 16 (1): 37-45.
25. Balčiauskienė L., Naruševičius V. 2006. Coincidence of small mammal trapping data with their share in the tawny owl diet. Acta Zoologica Lituanica, 16: 93–101.
26. Balestrieri A., Remonti L. & Prigioni C. 2004. Diet of the Eurasian badger (*Meles meles*) in an agricultural riverine habitat (NW Italy). Hystrix. Italian Journal of Mammalogy, 15: 3–12.
27. Balestrieri A., Remonti L. & Prigioni C. 2005. Local feeding specialization of the red fox (*Vulpes vulpes*) in response to eastern cottontail (*Sylvilagus floridanus*) introduction (NW Italy). Hystrix. Italian Journal of Mammalogy, 16: 113–126.
28. Balestrieri A., Remonti L., Ruiz-González A., Vergara M., Capelli E., Gómez-Moliner B.J. & Prigioni C. 2011. Food habits of genetically identified pine marten (*Martes martes*) expanding in agricultural lowlands (NW Italy). Acta Theriologica, 56: 199–207.
29. Balestrieri A., Remonti L., Capra R.B., Canova L. & Prigioni C. 2013. Food habits of the stone marten (*Martes foina*) (Mammalia: Carnivora) in plain areas of northern Italy prior to pine marten (*M. martes*) spreading. Italian Journal of Zoology, 80: 60–68.
30. Balestrieri, A.; Mosini, A.; Saino, N. 2016. Distribuzione ed ecologia di martora e faina nel Parco Nazionale della Val Grande 2015–2016. Technical report. University of Milan: Milan, Italy; 47 p.
31. Balestrieri A., Mosini A., Saino N. 2018. Distribuzione ed ecologia di martora e faina nel Parco Nazionale della Val Grande - Relazione finale anno 2016-2018. Technical report. University of Milan: Milan, Italy.

32. Balmer, J. (2002): Verhaltens- und nahrungsökologische Untersuchungen an Waldkauzpaaren (*Strix aluco*) während der Brutzeit in zwei aufeinanderfolgenden Jahren. - Dipl.arb. Univ. Jena.
33. Baudvin, H.; Jouaire, S. 2006. Le régime alimentaire d'une population forestière de Chouettes hulottes (*Strix aluco*) en Bourgogne. *Rev. Sci. Bourgogne-Nature*, 4, 85–89.
34. Baudvin H. 2010. Spécialiste, le Hibou moyen-duc (*Asio otus*)? *Rev. sci. Bourgogne-Nature*, 11: 55-57.
35. Baudvin H. 2012. Étude et protection de la Chouette hulotte en Bourgogne: Bilan 2011. EPOB, 14 p.
36. Baumgart W. 1975. An Horsten des Uhus (*Bubo bubo*) in Bulgarien. II. Der Uhu in Nordost-bulgarien (Aves, Strigidae). *Zool. Abh Mus. Tierk. Dresden* 33:251-275.
37. Baumgart, W., S. D. Simeonov, M. Zimmermann, H. Bünsche, P. Baumgart & G. Kühnast (1973): An Horsten des Uhus (*Bubo bubo*) in Bulgarien. I. Der Uhu im Iskerdurchbruch (Westbalkan). – *Zool. Abh. Mus. Tierkd. Dresden* 32 (14): 203-247.
38. Bayle, P. 1996. Régime alimentaire du grand-duc d'Europe *Bubo bubo* en période de reproduction dans le Parc National du Mercantour et ses environs Alpes-Maritimes et Alpes-de-Haute-Provence, France. *Avocetta*, 201, 12–25.
39. Beaud M. & Ceriani M. 1990 La Chouette de Tengmalm, *Aegolius funereus*, dans les Prealpes friborgeoises (1986 -1990). Actes du 30 Colloque interregional d'ornithologie Porrentruy (Suisse): 2-4 novembre 1990.
40. Bego, F., Kryštufek, B., Paspali, G. and Rogozi, E. 2008. Small terrestrial mammals of Albania: annotated list and distribution. *Hystrix Ital. J. Mamm.* 19(2): 83–101
41. Bělka in Danko (1989) – cited in Rymešová D. 2006. Složení potravy a hnízdní úspěšnost sýce rousného, *Aegolius funereus* (L., 1758), v CHKO Žďárské vrchy. *Bakalářská práce*. Brno, Masarykova univerzita, 75 pp.
42. Bellani (2016) - photo in Wilson D. E., Lacher T. E., Jr & Mittermeier R. A. (eds.). 2016. *Handbook of the Mammals of the World. Vol. 6. Lagomorphs and Rodents I.* Lynx Edicions, Barcelona, page 863
43. Beneš (1986) - cited in Rymešová 2006
44. Bennett D., Richard F.J. 2021. *Distribution modelling of the garden dormouse Eliomys quercinus* (Linnaeus, 1766) with novel climate change indicators. *Mammalian Biology*, 101: 589–599.
45. Bertolino S, Dore B (1995) Food habits of the stone marten *Martes foina* in „La Mandria“ Regional Park (Piedmont region, north-western Italy). *Hystrix* 7: 105–111.
46. Bertolino S., Ghiberti E. & Perrone A. 2001. Feeding ecology of the Long-eared Owl (*Asio otus*) in northern Italy: is it a dietary specialist? *Can. J. Zool.* 79: 2192–2198.
47. Beven, G. (1965) The food of the Tawny owl in London. *London Bird Report*, 29,5672.
48. Bezzel, E., Obst, J. & Wickl, K.-H. (1976). Zur Ernährung und Nahrungswal des Uhus (*Bubo bubo*). *Journal fur Ornithologie* 117, 210–238.
49. Biancardi, C. M. and Rinetti, L. 2001. The feeding habits of the pine marten *Martes martes* (L., 1758) (Mammalia, Mustelidae) in northern Luino area (northern Italy). – *Atti*

della Società Italiana di Scienze Naturali e del Museo Civico di Storia Naturale di Milano 142: 165–172

50. Bihari Z., Petrovics Z. & Szentgyörgyi P. (2000): A Zempléni-hegység emlősfaunája. – Fol. Hist.-nat. Mus. Matr. 24: 361–403.
51. Biro Z, Lanszki J, Szemethy L, et al. (2005) Feeding habits of feral domestic cats (*Felis catus*), wild cats (*Felis silvestris*) and their hybrids: trophic niche overlap among cat groups in Hungary. *J Zool* 266, 187–196
52. Bocheński Z 1990: The food of suburban tawny owls on the background of birds and mammals occurring in the hunting territory. *Acta Zoologica Cracoviensia* 33(9): 149–171.
53. Boiko 1971 - cited in Lozan et al. 1990, page 126
54. Bol'shakov (1969) - cited in Pukinskii J.B. 1977. *Zhizn' sov [The life of owls]*. Leningrad: Izdatel'stvo Leningradskogo universiteta, page 880.
55. Bond, G., Burnside, N.G., Metcalfe, D.J., Scott, D.M., Blamire, J. 2004. The effects of land-use and landscape structure on barn owl (*Tyto alba*) breeding success in southern England, U.K. *Lands. Ecol.* 20, 555 – 566
56. Bontzorlos V.A., Peris S.J., Vlachos Ch.G. & Bakaloudis D.E. 2005. The diet of barn owl in the agricultural landscapes of central Greece. *Folia Zoologica*, 54: 99–110.
57. Bontzorlos V.A., Peris S.J., Vlachos C.G. & Bakaloudis D.E. 2009. Barn Owl *Tyto alba* prey in Thessaly, and evaluation of Barn Owl diets throughout Greece. In: Johnson D.H., Van Nieuwenhuyse D. & Duncan J.R. (eds) *Proc. Fourth World Owl Conf.* Oct–Nov 2007, Groningen, The Netherlands. *Ardea* 97(4): 625–630.
58. Bose M and Guidali F. (2001). Seasonal and geographic differences in the diet of the barn owl in an agro-ecosystem in northern Italy. *Journal of Raptor Research* 35(3): 240–246.
59. Bouvier & Bayle (1989) cited in Galeotti 2001, Table 1
60. Breitenmoser U, Breitenmoser-Würsten C (2008) *Der Luchs: Ein Grossraubtier in der Kulturlandschaft. Band 2.* Salm Verlag, Wohlen/Bern
61. Bright P.W. & Morris P.A. 1996. Why are dormice rare? A case study in conservation biology. *Mammal Review*, 26: 157–187.
62. Brunet-Lecomte, P., Delibes, M. (1984). Alimentación de la lechuza *Tyto alba* en la cuenca del Duero, España. *Doñana, Acta Vertebrata*, 11 (2): 213-229.
63. Büchner, S. (Büro für ökologische Studien, Markersdorf, Germany). Personal communication.
64. Bulow & Franz (1982) cited in Rehage & Steinborn 1984
65. Burnier J. & Hainard R. 1948. Le Grand-duc chez lui. *Nos Oiseaux*, 19: 217–236.
66. Busch G., Jurall G., Radermacher H. 1991. Nisthilfenannahme und brutzeitliche Nahrung beim Rauhfußkauz (*Aegolius funereus*) im steirischen Salzkammergut. *Egretta*, 34 (2): 104–107.
67. Buser-Stalder (1979) cited in Vorpe 2012, page 104
68. Cagnin M. and Aloise G. 1994. Current status of Myoxids (Mammalia, Rodentia) in Calabria (Southern Italy). *Hystrix*, (n.s.), 6: 169-180.

69. Campos, F. (1978). Régimen alimenticio de *Tyto alba* en las provincias de Salamanca y Zamora. *Ardeola*, 24: 105-119.
70. Cantini M., 1991. The diet of the fox *Vulpes vulpes* in woodlands of Orobic Alps (Lombardy region, northern Italy). *Hystrix*, 3: 83-89
71. Capizzi D., Luiselli L. 1995. Comparison of the trophic niche of four sympatric owls (*Asio otus*, *Athene noctua*, *Strix aluco* and *Tyto alba*) in Mediterranean central Italy. In: *Ecologia mediterranea*, 21 (3-4): 13-20.
72. Capizzi D. & Luiselli L. 1996 Feeding relationships and competitive interactions between phylogenetically unrelated predators (owls and snakes). *Acta Oecol.*, 17: 265-282.
73. Capizzi, D.; Luiselli, L. 1997. The diet of the four-lined snake (*Elaphe quatuorlineata*) in Mediterranean central Italy. *Herpetol. J.* 7, 1–5.
74. Capizzi, D., & Luiselli, L. 1998. A comparative study of the variability of owl diets in three localities of central Italy. *Revue D Ecologie-La Terre Et La Vie*, 53, 367–385
75. Capizzi, D. 2000. Diet shifts of the tawny owl *Strix aluco* in central and northern Italy. *Ital. J. Zool.* 67, 73–79.
76. Capizzi, D., Caroli, L. & Varuzza, P. (1998) Feeding habits of sympatric long-eared owl *Asio otus* and barn owl *Tyto alba* in a Mediterranean coastal woodland. *Acta Ornithologica*, 33, 85–92
77. Capula, M., Luiselli, L. (1990): Analysis of the gut contents of *Vipera aspis* from an area of Central Italy (Tolfa Mountains, Latium): a new method to study the terrestrial small mammals. *Hystrix* 2: 101-107.
78. Capula M. & Luiselli L. 2002. Feeding strategies of *Elaphe longissima* from contrasting Mediterranean habitats in central Italy. *Italian Journal of Zoology*, 69: 153–156.
79. Carroll 2013
80. Carvalho, J. C., Gomes, P. (2001). Food habits and trophic niche overlap of the red fox, European wild cat and common genet in the Peneda-Geres National Park. *Galemys*, 13 (2): 39-48.
81. Catalisano A., Massa B. (1987) Considerations on the structure of the diet of the barn owl (*Tyto alba*) in Sicily (Italy), *Bolletino di Zoologia*, 54: 69-73.
82. Cattaneo, A., Grano M. Cattaneo C. 2012. Episodes of predation on adult specimens of edible dormouse, *Glis glis* (Linnaeus, 1766), by *Zamenis longissimus* (Laurenti, 1768). *Old World ratsnakes—Systematics, evolution, natural history and diversity*,
83. Cecere, F. & Vicini, G. 2000. Micromammals in the diet of the long-eared owl (*Asio otus*) at the W.W.F.'s Oasi San Giuliano (Matera, Southern Italy). *Hystrix Ital. J. Mammal* 11: 47–53.
84. Cecere J., S. Bombino and A. Santangeli 2013. Winter Diet of Long-eared Owl *Asio otus* in a Mediterranean Fragmented Farmland. – *The Wilson Journal of Ornithology*, 125: 655-658
85. Čejka J., 2005: Příspěvek k potravě ekologické syce rousného (*Aegolius funereus*) ve Žďarských vrších. In: Bryja J. & Zukal J. (eds), *Zoologické dny Brno 2006. Sborník abstraktů z konference 9.-10. února 2006. Ústav biologie obratlovců AV ČR, Brno*, pp. 162.

86. Cervený, J.; Obuch, J. 1988. Small mammals in a diet of the tawny owl in Sumava piedmont Lynx (Prague): 24: 5-14
87. Chanin, P.R.F., Linn, I.J. 1980. Diet of feral mink (*Mustela vison*) in south-west Britain. *Journal of Zoology*. 192: 205-223
88. Chavko J, Obuch J, Lipták J, Slobodník R & Baláž M. 2019. Changes in nesting habitat of the saker falcon (*Falco cherrug*) influenced its diet composition and potentially threatened its population in Slovakia in the years 1976–2016. *Raptor Journal*, 13: 75–104.
89. Cichocki, J., Janik-Superson, K., Królikowska, K., Lach, J., Rabiasz, J., & Zwijacz-Kozica, T. (2020). Orzesznica leszczynowa *Musccardinus avellanarius* w pokarmie lisa rudego *Vulpes vulpes* i kuny leśnej *Martes martes* w Tatrzańskim Parku Narodowym. *Kulon*, 25.
90. Ćirović, D.; Penezić, A.; Milenković, M.; Paunović, M. 2014. Winter diet composition of the golden jackal (*Canis aureus* L., 1758) in Serbia. *Mamm. Biol.*, 79, 132–137.
91. Clevenger, A.P. 1993. Spring and summer food habits and habitat use of the European pine marten (*Martes martes*) on the island of Minorca, Spain. *J. Zool.*, 229, 153–161.
92. Clevenger, A. P. (1993). Pine marten (*Martes martes* Linne, 1758) comparative feeding ecology in an island and mainland population of Spain. *Zeitschrift fur Saugetierkunde* 58, 212–224.
93. Clevenger AP (1995) Seasonality and relationships of food resource use of *Martes martes*, *Genetta genetta* and *Felis catus* in the Balearic Islands. *Rev d' Ecol (Terre et Vie)* 50:109–131
94. Contoli L. & Sammuri G. (1978) Predation on Small Mammals by Tawny Owl and Comparison with Barn Owl in the Farma Valley (Central Italy), *Italian Journal of Zoology*, 45:4, 323-335
95. Contoli L., Agostini F., Aloise G, Testa A. 1983. Sul rapporto trofico tra i microinanimiferi terragnoli ed il Barbagianni nei Monti della Tolfa. *Quaderni Acc. Naz. Lincei*, 256: 183-228.
96. Contoli L., Aloise G., Filippucci M.G. 1988. Sulla diversificazione trofica di Barbagianni *Tyto alba* e Civetta *Athene noctua* in rapporto al livello diagnostico delle prede. *Avocetta* 12: 21-30.
97. Corail M., Kayser Y. & Spada F. (2020). Analyse du régime alimentaire de la Chevêchette d'Europe (*Glaucidium passerinum*) dans le Champsaur et le Dévoluy (Hautes-Alpes). *Faune-PACA Publication* 94: 16 pp.
98. Corral, J. F., Cortés, J. A., Gil, J. M. (1979). Contribución al estudio de la alimentación de *Asio otus* en el sur de España. *Doñana, Acta Vertebrata*, 6 (2): 179-190.
99. Cserkesz T. 2003. A macskabagoly (*Strix aluco*) időszakos pele-preferenciájának vizsgálata a Bükk-hegységben köpetelemzés alapján. *Folia Historico Naturalia Musei Matraensis*. 27: 365-370.
100. Debernardi P. Patriarca E. 1988. Preliminary data on feeding habits of the Tawny owl (*Strix aluco*) in «La Mandria» Regional Park (Turin, Italy). *Riv. Piem. St. Ant.* 9: 189-196.

101. Debernardi P., Patriarca E., 1988 – Dati preliminari sull'alimentazione dell'Allocco *Strix aluco* nel Parco Regionale La Mandria (TO) (*Aves, Strigidae*) - Rivista Piemontese di Storia Naturale, vol. IX: 189-196.
102. Debernardi, P., Durio, P., and Perrone, A. (1991). Winter food of the fox *Vulpes vulpes* in the Province of Cuneo (North-Western Italy) / Alimentazione invernale della Volpe *Vulpes vulpes* nell'Albese (Provincia di Cuneo). *Hystrix, the Italian Journal of Mammalogy*, 3: 99–104
103. Deffarges J. (2020) Illustration commentée du régime alimentaire de la Chouette hulotte *Strix aluco* dans les Alpes-Maritimes. Faune-PACA Publication 102: 30 pp.
104. Delibes & Castro 1975 – cited in Moreno, S. 2017. Lirón careto – *Eliomys quercinus*. In *Enciclopedia Virtual de los Vertebrados Españoles*; Salvador, A., Barja, I., Eds.; Museo Nacional de Ciencias Naturales: Madrid, Spain. Table 1. Available online: <http://www.vertebradosibericos.org/>
105. Delibes, M., García, L. (1984). Hábitos alimenticios del milano real en Doñana durante el período de cría. *Ardeola*, 31: 115-121.
106. Delibes, M. (1974). Sobre alimentación y biología de la gineta (*Genetta genetta* L.) en España. *Doñana, Acta Vertebrata*, 1: 143-199.
107. Delibes, M. (1978). Ecología alimenticia del águila imperial ibérica (*Aquila adalberti*) en el Coto Doñana durante la crianza de los pollos. *Doñana, Acta Vertebrata*, 5: 35-60.
108. Delibes, M. (1978b). Feeding habits of the stone marten, *Martes foina* (Erxleben, 1777), in northern Burgos, Spain. *Zeitschrift für Säugetierkunde*, 43 (5): 282-288.
109. Delibes, M. (1980). El lince ibérico. Ecología y comportamiento alimenticio en el Coto Doñana, Huelva. *Doñana, Acta Vertebrata*, 7 (3) (Esp.): 1-128.
110. Delibes, M., Aymerich, M., Cuesta, L. (1984). Feeding habits of the Egyptian mongoose or Ichneumon in Spain. *Acta Theriol.*, 29: 205-218.
111. Delmee E, Dachy P & Simon P 1979: Etude comparative du regime alimentaire d'une population forestiere de Chouettes hulottes (*Strix aluco*). *Le Gerfaut* 69: 45–99.
112. Demay J., Bautheac D., Ponchon C., Badan O. 2015. Relations entre régime alimentaire et disponibilité des proies chez le grand-duc d'europe *bubo bubo* dans le massif des alpilles depuis 30 ans. *Alauda*, 83 (3): 195-202.
113. Demerdzhiev D, Boev Z, Dobrev D, Terziev N, Nedyalkov N, Stoychev S, Petrov T (2022) Diet of Eastern Imperial Eagle (*Aquila heliaca*) in Bulgaria: composition, distribution and variation. *Biodiversity Data Journal* 10: e77746.
114. Demyanchik V.T. 1993. [Possibilities and some results of the use of owl's diet data in the evaluation of the small mammal species diversity]. In: Nikiforov M. E. (ed.) *Okhranyaemye zhivotnye Belorusi [Protected animals of Belarus]*. Vol. 3. Minsk: Ecological Center "Veras-Eco", 38–43
115. Demianchyk, V. 2009. Long-term dynamics of wood species of Micromammalia on the Vygonoshchi wood-marsh file. *Scientific Journal of Lesya Ukrainka Volyn National University*, 2, 234–238.

116. Demyanchik V.T. 2019. Changes of nutrition of *Bubo bubo* in the Southern Part of Belarus. *Веснік Брэсцкага ўніверсітэта. Серыя 5. Хімія. Біялогія. 26 Навукі аб зямлі* № 1: 26–32.
117. Desfayes M., Geroudet P. 1949. Notes sur le Grand-duc. *Nos Oiseaux*, 20: 49-60.
118. Díaz-Ruiz F, Delibes-Mateos M, García-Moreno JL, María López-Martín J, Ferreira C, Ferreras P (2013) Biogeographical patterns in the diet of an opportunistic predator: the red fox *Vulpes vulpes* in the Iberian Peninsula. *Mammal Review* 43: 59–70
119. Donaurov S.S., Popov V.C. & Khonjakina Z.P. 1938. The dormouse (*Glis glis caspicus* (Sat.) in the Caucasian reservation territory. In: *Trudy Kavkazkogo gosudarstvennogo zapovednika [Proceedings of the Caucasian state reserve]*, 1: 227–280
120. Donázar, J. A. (1989). Variaciones geográficas y estacionales en la alimentación del búho real (*Bubo bubo*) en Navarra. *Ardeola*, 36 (1): 25-39.
121. Draus, B. 2003. Seasonal variation in the barn owl (*Tyto alba guttata*) diet in the Krakow-Czestochowa upland (South Poland). *Buteo* 13: 21–30.
122. Dravecký M, Danko Š, Obuch J, Kicko J, Maderič B, Karaska D, Vrána J, Šreibr O, Šotnár K, Vrlík P & Boháčik L 2008: Diet of the Lesser Spotted Eagle (*Aquila pomarina*) in Slovakia. *Slovak Rapt J* 2: 1–18.
123. Drebet M.V. 2009. Diet of Long-eared Owl in the Kamenetskoe Prydnestrovie, Ukraine. In: *Sovy severnoj Evrazii: ekologija, prostranstvennoe i biotopičeskoe raspredelenie*. Moskva. 304 p.
124. Drenik K. 2007. *Diet of wild boar (Sus scrofa) in Kočevje region*. Unpublished graduation thesis. University of Ljubljana
125. Ducret B. 2015. Chouette hulotte (*Strix aluco*) – Rapport d’activité 2015 du Groupe Broyard de Recherches Ornithologiques. Chouette mélanique – GBRO.
126. Eden S.M. & Eden R.M.G. 2003. Further observations on dormice in Dorset. *Dorset Natural History and Archaeological Society Proceedings*, 125: 125–129.
127. Eden S. 2009. *Living with dormice. The common dormouse: Real rodent or phantom of the ancient wood?* Winterbourne: Papadakis Publisher.
128. Ericsson, P., Nilsson, L.-O., Haglund, K. & Ericsson, D. 2014: Breeding biology of a Tawny Owl *Strix aluco* population in southwestern Sweden – a 15-year survey. — *Ornis Svecica* 24: 41–50.
129. Escribano, N., Galicia, D., Ariño, A. H., & Escala, C. 2016. Data Descriptor: Long-term data set of small mammals from owl pellets in the Atlantic-Mediterranean transition area. *Scientific Data*, 3:160085 | DOI: 10.1038/sdata.2016.85
130. Fais I., Costanzo M., Massa B. 1991 Primi dati sulla posizione trofica della Volpe (*Vulpes vulpes*) in Sicilia – *Hystrix*, 3: 105-112.
131. Fasano R., Maglio G. (1995) Otter presence in Lattari Mountains (Campania Region, Southern Italy). *Hystrix*, 7(1-2): 243-245
132. Fernandez J.M. & Ruiz de Azua N. 2009. Contribución al conocimiento de la dieta invernal de la marta (*Martes martes*) en el país vasco. *Galemys*, 21 (2): 47–59.
133. Filippi, E., Rugiero, L., Capula, M., Capizzi, D. & Luiselli, L. (2005) Comparative food habits and body size of five populations of *Elaphe quatuorlineata*: the effects of habitat



- variation, and the consequences of intersexual body size dimorphism on diet divergence. *Copeia*, 2005, 517–525.
134. Freixas et al. 2012 cited in Ortiz-Jiménez & Pardavila 2021
  135. Frey H. & Walter W. 1986. Zur Ernährung des Uhus, *Bubo bubo* (Linnaeus 1758), Aves, an einem alpinen Brutplatz in den Hohen Tauern (Salzburg, Österreich). *Annalen des Naturhistorischen Museums in Wien*, 88/89: 91–99.
  136. Frey C., Sonnay C., Dreiss A. & Roulin A. 2011. Habitat, breeding performance, diet and individual age in Swiss barn owls (*Tyto alba*). *Journal of Ornithology*, 152: 279–290.
  137. Gaisler, J., Zukal, J., Nesvadbov, J., Chytil, J. & Obuch, J. (1996) Species diversity and relative abundance of small mammals (Insectivora, Chiroptera, Rodentia) in the Palava Biosphere Reserve of UNESCO. *Acta Societatis Zoologicae Bohemicae*, 60, 13–23.
  138. Galeotti, P., Canova L. (1994): Winter diet of Long-eared Owl (*Asio otus*) in the Po Plain (Northern Italy). *Journal of Raptor Research* 28: 265–268.
  139. Gasow (1968) cited in Rehage & Steinborn 1984.
  140. Gaspar G., Wierzbowska I. A., Misiewicz A., Armatys P., Loch J., Czarnota P., Wierzbowski J. 2018. Skład pokarmu wybranych ssaków drapieżnych na terenie Gorczańskiego Parku Narodowego. *Sylvan* 162 (4): 333–342.
  141. Genovesi, P.; Secchi, M.; Boitani, L. 1996. Diet of stone martens: An example of ecological flexibility. *J. Zool.*, 238, 545–555.
  142. Geptner (1932) cited in Ognev 1947.
  143. Germain, E., Ruetten, S. & Pouille, M. L. (2009). Likeness between the food habits of European wildcats, domestic cats and their hybrids in France. *Mammalian Biology* 74, 412–417.
  144. Gil-Sánchez, J. M. (1998). Dieta comparada del gato montés (*Felis silvestris*) y la jineta (*Genetta genetta*) en un área de simpatria de las Sierras Subbéticas (SE España). *Miscellanea Zoológica*, 21: 57–64.
  145. Gil-Sánchez J. M., Ballesteros-Duperón E. and Bueno-Segura J. F. 2006. Feeding ecology of the Iberian lynx *Lynx pardinus* in eastern Sierra Morena (Southern Spain). *Acta Theriologica* 51: 85–90.
  146. Giovo, unpublished data - cited in Capizzi (2000), page 75, Table I.
  147. Glue D.E. & Hammond G.J. 1974. Feeding ecology of the Long-eared Owl in Britain and Ireland. *British Birds* 67: 361–369.
  148. Godin, J. 1975. Données sur le régime alimentaire de la Chouette effraie (*Tyto alba*) en Belgique et dans le nord de la France. *Aves* 12: 105–126
  149. Goethe, F. 1955. Die Säugetiere des Teutoburger Waldes und des Lipperlandes. *Abh. Landesmus. Naturkunde Münster Westfalen*, 17, 5–195.
  150. Görner M. 1973: Ergebnisse von Gewöllanalysen der Schleiereule (*Tyto alba*) im südthüringischen Grabfeld. *Hercynia N. F.* 10: 127–142
  151. Görner M. 2010 Ergebnisse einer sechzigjährigen Uhuhorstkontrolle *Bubo bubo* in Thüringen. *Charadrius*, 46 (1–2): 56–64.

152. Goszczynski, J., Jablonski, P., Leskinski, G. & Romanowski, J. (1993) Variation in diet of tawny owl *Strix aluco* L. along an urbanization gradient. *Acta Ornithologica* 27: 113–123.
153. Gotta A. & Pigozzi G. (1997): Trophic niche of the barn owl and little owl in a rice field habitat in northern Italy, *Italian Journal of Zoology*, 64:1, 55-59
154. Götz M. 2015. Wildkatze (*Felis silvestris silvestris* Schreber, 1777). Berichte des Landesamtes für Umweltschutz Sachsen-Anhalt, Halle, Heft 2/2015.
155. Granata, M., Mosini, A., Piana, M., Zambuto, F., Capelli, E. & Balestrieri, N. (2022) Nutritional ecology of martens (*Martes foina* and *Martes martes*) in the Western Italian Alps. *Ecological Research*, 37:127–136.
156. Grašytė G. 2017. Timing of breeding, dynamics of individual and population parameters, their longterm changes and relationships with habitat and climate change in Tawny Owl *Strix aluco*. *Doctoral Thesis. Nature Research Centre, Vilnius, Lithuania*.
157. Grašytė G., Rumbutis S., Dagys M., Treinys R. 2016. Breeding performance, apparent survival, nesting location and diet in a local population of the Tawny Owl *Strix aluco* in Central Lithuania over long-term. *Acta Ornithologica* 51 (2), 163–174.
158. Gregor T. 2005. Jagdbeute der Schleiereule (*Tyto alba*) im Schlitzlerländer Ortsteil Rimbach. *Beiträge zur Naturkunde in Ostthessen*. 41; 5–7.
159. Gromov I.M. 1967. Antropogennaja istorija sovremennoi fauny gryzunov SSSR (fakty i nekotorye problemy issledovanij. *Zool. Zh.* 46 (10): 1566-1584.
160. Gryz J, Krauze-Gryz D. 2017. Mammals in the diet of tawny owl *Strix aluco* in western part of Skierniewice Forest district (Central Poland). *Forest Research Papers*. 78(4): 297-302
161. Gryz J, Krauze-Gryz D (2019) Changes in the tawny owl *Strix aluco* diet along an urbanisation gradient. *Biologia* 74:279–285
162. Gryz J., Krauze-Gryz D. & Lesiński G. 2011. Mammals in the vicinity of Rogów (central Poland). *Fragmenta Faunistica* 54: 183–197.
163. Gryz J., Lesiński G., Kowalski M. & Krauze D. 2012. Skład pokarmu puszczyka *Strix aluco* w Puszczy Białowieskiej. *Chrońmy Przyrodę Ojczystą* 68 (2): 100–108
164. Guerra, C., García, D., & Alcover, A. (2014). Unusual foraging patterns of the barn owl, *Tyto alba* (Strigiformes: Tytonidae), on small islets from the Pityusic archipelago (Western Mediterranean Sea). *Folia Zoologica*, 63(3), 180–187.
165. Haensel, J.; Walther, H.J. (1966): Beitrag zur Ernährung der Eulen im Nordharz-Vorland unter besonderer Berücksichtigung der Insektennahrung. - Beitr. Vogelkd. 11: 345–358.
166. Haensel, J.; Walther, H.J. (1970/71): Vergleichende Betrachtungen über die Ernährung der Eulen des Harzes und des nördlichen Harzvorlandes mit Hinweisen zur Kleinsäugerfaunistik. - Naturkd. Jber. Mus. Heineanum V/VI: 83–93.
167. Halle S (1988) Avian predation upon a mixed community of common voles (*Microtus arvalis*) and wood mice (*Apodemus sylvaticus*). *Oecologia* 75:451–455
168. Haltenorth 1957 - cit in Schauenberg 1981 (Table 1)
169. Haraszthy L., Márkus F. & Petrovics Z. (1989): Újabb adatok az uhu (*Bubo bubo*) magyarországi táplálkozásáról. – Madártani Tájékoztató 1–2: 6–9.

170. Haraszthy et al. 1996 – cited in Dravecky et al. 2008, Table 5
171. Hartová-Nentvichová M., Šálek M., Červený J. & Koubek P. 2010. Variation in the diet of the red fox (*Vulpes vulpes*) in mountain habitats: effects of altitude and season. *Mammalian Biology*, 75: 334–340.
172. Hecker, K.; Bakó, B.; Csorba, G. 2003. New data on the distribution of the Hungarian dormouse species (Gliridae). *Állattani Közlemények*, 88, 57–67.
173. Heddergott M. 2004. Zur Ernährung des Mauswiesels (*Mustela nivalis*) in Nordwestthüringen. *Säugetierkundliche Informationen*, 5 (28): 383–390.
174. Henrioux 2006 Tab 4 Regime alimentaire Tengmalm: analyse des fonds 1991-2005 (15 ans)
175. Hiraldo, F., Andrada, J., Parreño, F. F. (1975). Diet of the Eagle Owl (*Bubo bubo*) in Mediterranean Spain. *Doñana, Acta Vertebrata*, 2 (2): 161-177.
176. Hisano, M., Raichev, E.G., Peeva, S., Georgiev, D.M., Tsunoda, H., Masuda, R., Kaneko, Y., 2014. Notes on autumn-winter stomach contents of the stone marten (*Martes foina*) in the Balkan Mountains, central Bulgaria. *ZooNotes*, 56, 1–6.
177. Hlasek L.- photo in Juškaitis R. & Büchner S. 2010. Die Haselmaus *Muscardinus avellanarius*. Die Neue Brehm-Bücherei, Bd. 670. Westarp Wissenschaften, Hohenwarsleben, p. 108.
178. Holy P., 2002: Potravni ekologie syce rousneho (*Aegolius funereus* L.) v imisnich oblastech Krušných hor. Diplomova prace LF ČZU v Praze, 106 pp.
179. Horváth, M., Solti, B., Fatér, I., Juhász, T., Haraszthy, L., Szitta, T., Ballók, Zs. & Pásztory-Kovács, Sz. 2018. Temporal changes in the diet composition of the Eastern Imperial Eagle (*Aquila heliaca*) in Hungary. – *Ornis Hungarica* 2018(1): 1–26.
180. Iborra, O.; Arthur, C.; Bayle, P. 1990. Importance trophique du lapin de garenne pour les grands rapaces provençaux. *Vie et Milieu*, 40, 177–188.
181. Ivanova (1962) - cited in Rossolimo et al. 2001
182. Janossy D. & Schmidt E. 1970. Die Nahrung des Uhus (*Bubo bubo*). Regionale und erdzeitliche Änderungen. *Bonner zoologischer Beiträge*, 21: 25–51
183. Janossy D., Petrovics Z. Szilagyi G. 1992. Adatok a Zempléni-hegységben költő uráli baglyok (*Strix uralensis*) nyári táplálékához. – *Aquila*, 99: 173-175, 186-188.
184. Janzekovic, F. & Ficko, M. 2000. Diet composition of the barn owl *Tyto alba* at Goricko. *Acrocephalus* 21: 27–29
185. Janžekovič F., Polc M., Petovar P., Klenovšek t. 2017. Diet of the Tawny Owl *Strix aluco* in the area of Slovenske gorice (NE Slovenia). *Acrocephalus*, 37: 45–53.
186. Jentzsch, M. (1988): Zur Säugetier-Fauna des Kreises Sangerhausen. - Beitr. Heimatforsch. Spengler-Mus. Sangerhausen 9: 14–53.
187. Jentzsch M. 2004. Zur Verbreitung der Haselmaus (*Muscardinus avellanarius* Linnaeus, 1758) in Sachsen-Anhalt. *Herzynia N. F.*, 37: 127–135.
188. Jentzsch, M.; Wagner, M. (2000): Zum Vorkommen terrestrisch lebender Kleinsäuger im Thüringer Südharz (Mammalia). - Thüringer Faun. Abh. VII: 5–10.
189. Jeremchenko & Toropova (1975) -cited in Long-eared owl *Asio otus*  
<http://www.egir.ru/bird/157.html>

190. Jovanovic-Grove T., Šćiban M. & Ružić M. 2008. Study of Tawny Owl *Strix aluco* diet from pellet samples collected in Serbia. *The owl pages*.  
<https://www.owlpages.com/owls/articles.php?a=58>
191. Joveniaux A., Durand G. 1987. Gestion forestiere et ecologie des population de Chonette de Tegmmaem (*Aegolius funereus*) dans l'Est de la France. *Rev. Ecol.*, 42 (4): 83–96.
192. Juškaitis R. 2001. Kaip toli skrenda medžioti naminės pelėdos? *Ciconia*, 9: 30–31.
193. Juškaitis R. 2004b. Local impact of the tawny owls (*Strix aluco*) on the common dormice (*Muscardinus avellanarius*) in Lithuania. *Ekológia (Bratislava)*, 23: 305–309.
194. Kadochnikov (1962) - cited in Pukinskii J.B. 1977. *Zhizn' sov [The life of owls]*. Leningrad: Izdatel'stvo Leningradskogo universiteta, page 880.
195. Kadochnikov N. P. 2013. Наблюдения за гнездованием и питанием мохноногого сыча *Aegolius funereus* в Савальском лесничестве. *Русский орнитологический журнал* 2013, Том 22, Экспресс-выпуск 889: 1589-1592
196. Källander H. 1959. Photographic studies of some less familiar birds. XCHI. Tengmalm's owl. *British Birds*, vol. LII.
197. Kalotas Z. 1985. Adatok A macskabagoly (*Strix aluco*) táplálkozásához. - *Madártani Tájékoztató* 1989.1-2: 29-35.
198. Kampfer-Lauenstein, A. & Lederer, W. " 2010. Populationsdynamik des Raufußkauzes *Aegolius funereus* im Arnsberger Wald Andreas. *Charadrius* 46: 69–78.
199. Kašpar T. & Anděra M., 2011: Drobní savci ve vývržcích sov na Moravě a ve Slezsku, Česká republika (Eulipotyphla, Chiroptera, Rodentia) [Small mammals in the pellets of owls in Moravia and Silesia, Czech Republic (Eulipotyphla, Chiroptera, Rodentia)]. *Lynx*, n. s., 42: 113–132
200. Kiamos N., Lymberakis P., Rallis G. & Poulakakis N. (2019) Barn Owl (*Tyto alba*) prey in Evros (Greece) and the discovery of a new mammal for the Greek fauna, *Journal of Natural History*, 53: 1691-1705.
201. Kitel', D.A. 2010. Peculiarities of breeding of some owl species in the Brest oblast'. Master's Thesis, Brest state A.S. Pushkin university, Brest, Belarus.
202. Kitowski I., Pitucha G. 2007. Diet of the Eurasian Tawny owl in farmland of east Poland. *Ekologija. Berkut*. 6 (2): 225-231.
203. Kitowski I. 2013. Winter diet of the barn owl (*Tyto alba*) and the long-eared owl (*Asio otus*) in eastern Poland. *North-Western Journal of Zoology*, 9: 16–22.
204. Klaas, C. 1971. Zur Verbreitung des Raufußkauzes. *Natur und Museum*, 101, 467–471.
205. Klaus S., Mikkola H. & Wiesner J. . 1975. Aktivität und Ernährung des Rauhfusskauzes, *Aegolius funereus* (L.), während der Fortpflanzungsperiode. *Zool. Jb.* 102: 485–507.
206. Kloubec B. & J. Obuch (2003): Distribution of small mammals in the Bohemian Forest based on food analysis of Tengmalm's Owl (*Aegolius funereus*) — *Silva Gabreta* 9: 183- 200. Kloubec B. & Vacík R. 1990. Outline of food ecology of Tengmalm's owl (*Aegolius funereus* L.) in Czechoslovakia. *Tichodroma (Bratislava)*, 3: 103–125

207. Kloubec B., 1990: Dosavadni poznatky o složení potravy syce rousneho (*Aegolius funereus* L.) na Šumavě. In: Sbornik z ornitologické konference Přerov 1989. Statni zemědělské nakladatelství, Praha, 72 pp.
208. Kociuba M. 2012. Factors affecting diet composition of the Ural owl *Strix uralensis* at the foothills of the central Beskidy Mountains, SE Poland. *Ornis Polonica*, 53: 283–292
209. Kodzhabashev, N. D., Dipchikova, S. M., & Teofilova, T. M. (2020). New and Conservationally Significant Small Mammals in the Diet of Two Wintering Groups of Long-eared Owls (*Asio otus* L.) from the Region of Silistra (NE Bulgaria). *Ecologia Balkanica*.3: 117-128.
210. Kodzhabashev et al., 2020 N.D. Kodzhabashev, S.M. Dipchikova, T.M. Teofilova Landscape structure impacts the small mammals as prey of two wintering groups of Long-eared Owls (*Asio otus* L.) from the region of Silistra (NE Bulgaria). *Ecol. Balk.*, 3: 129-138
211. König, C. 1969. Sechsjährige Untersuchungen an emer Population des Rauhfussskauzes *Aegolius funereus* (L.) J. Ornithol. 110 :133—147
212. Kozlov (1939) – cited in Ognev (1947)
213. Krofel, M., Potočník, H., & Kos, I. (2007). Topographical and vegetational characteristics of lynx kill sites in Slovenian Dinaric Mountains. *Natura Sloveniae*, 9, 25–36
214. Krofel M, Huber D, Kos I (2011) Diet of Eurasian lynx *Lynx lynx* in the northern Dinaric Mountains (Slovenia and Croatia): importance of edible dormouse *Glis glis* as alternative prey. *Acta Theriol* 56:315–322
215. Kubik J, Leniec H, Sitkowski W. 1984. Analysis of the mammal Fauna of the Lublin Coal Basin based on owl pellets. *Acta Theriologica*. 29(13):167-173
216. Kuhar, B.; Kalan, G.; Janžekovič, F. 2006. Diet of the Tawny Owl *Strix aluco* in the Kozjansko region (E Slovenia). *Acrocephalus*, 27, 147–154
217. Kulajeva T. M. 1949. Materialy po ekologija filina (*Bubo bubo ruthenus* Zhitikow et Buturlin). Iswest. Kasanskowo filiala A N SSSR, Ser. Biol. 1, p. 197–205.
218. Kulczycki A 1964: Badania nad składem pokarmu sów z Beskidu Niskiego [Study on the make up of diet of owls from the Niski Beskid Mts.]. *Acta Zoologica Cracoviensia* 9(9): 529–559.
219. Kuzmenko, Yu.; Mishta, A. 2014. Diet of Tengmalm's owl (*Aegolius funereus*) and great grey owl (*Strix nebulosa*) in northern Ukraine. *Proceedings of the Zoological Museum*, 45, 65–69.
220. Lang J. 2013. Säugetiere als Beute von Hauskatzen im Kreis Höxter. *Säugetierkundliche Informationen*, Jena 9: 105-109
221. Lang J. 2015. Die Katze lässt das Mäusen nicht – aktuelle Ergebnisse einer Nahrungsanalyse an europäischen Wildkatzen aus dem Zentrum ihrer Verbreitung. *Felis Symposium - Der aktuelle Stand der Wildkatzenforschung in Deutschland - Giessen*, 2015, Seite 119-127
222. Lang, J. (Justus-Liebig-University Giessen, Germany). Personal communication.

223. Lange, PNAMJG, Lelieveld, G., Knecht, HJ de (2021) Diet composition of the golden jackal *Canis aureus* in south-east Europe - a review. *Mammal Review*. 51: 207–213.
224. Lanszki, J. & Heltai, M. 2002: Feeding habits of golden jackal and red fox in south-western Hungary during winter and spring. — *Zeitschrift für Säugetierkunde* 67: 128–136.
225. Lanszki, J. Heltai, M. (2007) *Diet of the weasel in Hungary*. *Folia Zoologica*, 56 (1): 109-112.
226. Lanszki, J. 2003: Feeding habits of stone martens in a Hungarian village and its surroundings. - *Folia Zoologica* 52: 367-377
227. Lanszki, J., Kormendi, S., Hancz, C. & Zalewski, A. 1999: Feeding habits and trophic niche overlap in a Carnivora community of Hungary. - *Acta Theriologica* 44: 429-442.
228. Lanszki, J., Heltai, M. & Szabó, L. 2006: Feeding habits and trophic niche overlap between sympatric golden jackal (*Canis aureus*) and red fox (*Vulpes vulpes*) in the Pannonian ecoregion (Hungary). — *Canadian Journal of Zoology* 84: 1647–1656.
229. Lanszki, J., Zalewski, A. & Horvath, G. 2007: Comparison of red fox *Vulpes vulpes* and pine marten *Martes martes* food habits in a deciduous forest in Hungary. - *Wildl. Biol.* 13: 258-271.
230. Lanszki, J., Sárdi, B., & Széles, L. G. 2009. *Feeding habits of the stone marten (Martes foina) in villages and farms in Hungary*. *Natura Somogyiensis*, 15; 231-246.
231. Lanszki, J., Giannatos, G., Heltai, M. & Legakis, A. 2009: Diet composition of golden jackals during cub-rearing season in Mediterranean marshland, in Greece. — *Mammalian Biology* 74: 72–75.
232. Lanszki, J., Giannatos, G., Dolev, A., Bino, G. & Heltai, M. 2010: Late autumn trophic flexibility of the golden jackal (*Canis aureus*). — *Acta Theriologica* 55: 361–370.
233. Lanszki, J., Kurys, A., Heltai, M., Csányi, S. & Ács, K. 2015: Diet composition of the golden jackal in an area of intensive big game management. — *Ann. Zool. Fennici* 52: 243–255.
234. Latkovà, H., Sàndor, A.K. & Kriřtìn, A. (2012). Diet composition of the scops owl in Central Romania. *Slovak Raptor J.* 6,17-26.
235. Leiva, A., Pareja, G., Aragonés, J. (1994). Alimentación del Aguila Perdicera (*Hieraaetus fasciatus*) en la provincia de Córdoba. *Aegypius*, 12: 15-21.
236. Lesiński G., Beuch S. 2016. Small mammal community in suburban forests of Bytom based on the analysis of Tawny Owl's *Strix aluco* diet. *Kulon* 21: 31-39
237. Lesiński G., Gryz J. 2008. Localities of three rare mammal species in central and northeastern Poland. *Fragmenta Faunistica* 51 (1): 41–51.
238. Lesinski, G., & Wojtowicz, B. (2021). Drobne ssaki północnej części Puszczy Kozienickiej na podstawie analizy diety puszczyka *Strix aluco*. *Kulon*, 26: 69-74.
239. Lesiński G, Błachowski G, Siuchno M (2009) Vertebrates in the diet of the tawny owl *Strix aluco* in northern Podlasie (NE Poland) – comparison of forest and rural habitats. *Fragm Faun* 52:51–59
240. Lesiński G, Gryz J, Romanowski J, Olszewski A, Kowalski M, Krauze-Gryz D, et al. 2013. Small mammals of Kampinos National Park and its protection zone, as revealed by

- analyses of the diet of tawny owls *Strix aluco* Linnaeus, 1758. *Fragmenta Faunistica*. 56(1):65-81
241. Lesiński G., Romanowski J., Budek S. 2016a. Winter diet of the long-eared owl *Asio otus* in various habitats of central and north-eastern Poland. *Annals of Warsaw University of Life Sciences – SGGW. Animal Science* 55: 81-88.
  242. Lesiński G., Stolarz P., Gryz J., Dąbrowski R., Krauze-Gryz D., Skrzypiec-Nowak P., Świć J., 2016b. Small mammals in the diet of owls in the Masovian Landscape Park and in adjacent areas. *Fragmenta Faunistica* 59, 2: 73-86.
  243. Lesiński, G., Gryz, J., & Krauze-Gryz, D. (2017). Which species of small mammals tolerate highly urbanized areas—the study in Warsaw agglomeration and surroundings. *Studia Ecologiae et Bioethicae*, 15(4), 5-13.
  244. Lesiński, G., Olech, B., & Błachowski, G. 2021. Small mammals of an agricultural landscape in Pawlinowo, northern Podlasie, revealed in the diet of the tawny owl *Strix aluco*. *Przegląd Przyrodniczy*, XXXII, 2: 73-79
  245. Liberek, M., 1999. *Eco-ethologie du chat sauvage Felis S. silvestris*, Schreber 1777 dans le Jura Vaudois (Suisse). Influence de la couverture neigeuse. The`se de doctorat, Universite´ de Neuchaˆtel. Libois et al. 1983
  246. Libois, R. & P. Gailly (1984) Sur le r´egime alimentaire de la Chouette de Tengmalm (*Aegolius funereus*) en Belgique. *Aves* 21: 57-59
  247. Lindemann (1953) cited in Schauenberg 1981 (Table 1)
  248. Lindemann (1964) cited in Schauenberg 1981 (Table 1)
  249. Lipej, L.; Kryštufek, B. 1999. Dormice as prey of owls: evidence from Slovenia. In *IVth International Conference on Dormice (Rodentia, Gliridae). 13–16 September 1999. Edirne – Turkey. Abstract Book*. Trakya University Press: Edirne, Turkey, p. 26.
  250. Lombardini, M.; Murru, M.; Repossi, A.; Cinerari, C.E.; Vidus Rosin, A.; Mazzoleni, L.; Meriggi, A. Spring diet of the pine marten in Sardinia, Italy. *Anim. Biodivers. Conserv.* **2015**, 38, 183–190.
  251. López-Gordo, J. L., Lázaro, E., Fernández Jorge, A. (1977). Comparación de las dietas de *Strix aluco*, *Asio otus* y *Tyto alba* en un mismo biotopo de la provincia de Madrid. *Ardeola*, 23: 189-221.
  252. Lovari S., 1974 - The feeding habits of four raptors in Central Italy. *Raptor Res.*, 8: 45–47.
  253. Love R.A., Webon Ch., Glue D.E. & Harris S. 2000. Changes in the food of British barn owls (*Tyto alba*) between 1974 and 1997. *Mammal Review*, 30: 107–129.
  254. Lozan M.N. 1970. *Gryzuny Moldavii [Rodents of Moldavia]*. Vol. 1. Kishinev: Redaktsionno-izdatel'skii otdel Akademii nauk Moldavskoi SSR, 168 pp.
  255. Lozan M., Belik L. & Samarskii S. 1990. *Soni (Gliridae) yugo-zapada SSSR [Dormice (Gliridae) of the south-west USSR]*. Kishinev: Shtiintsa.
  256. Luiselli L.M. & Agrimi U. 1991. Composition and variation of the diet of *Vipera aspis francisciredi* in relation to age and reproductive stage. *Amphibia-Reptilia*, 12: 137–144.

257. Luiselli L., Capizzi D. 1996. Composition of a small mammal community studied by three comparative methods. *Acta Theriologica* 41: 425-431.
258. Luiselli L.M. & Rugiero L. 1990. On habitat selection and phenology in six species of snakes in Canale Monterano (Tolfa Mountains, Latium, Italy) including data on reproduction and feeding in *Vipera aspis francisciredi* (Squamata: Viperidae). *Herpetozoa*, 2: 107–115.
259. Luka, V. & Riegert, J. 2018. Apodemus mice as the main prey that determines reproductive output of tawny owl (*Strix aluco*) in Central Europe. *Popul. Ecol.* 60: 237–249.
260. Lustrat P. (2002) Le régime alimentaire de la Chouette effraie dans le massif de Fontainebleau. *La voix de la forêt* 2002/1: 16-18.
261. Lutz W (1978) Beitrag zur Nahrung des Rotfuchses (*Vulpes vulpes* L.) im Nationalpark Bayrischer Wald. *Z Jagdwiss* 24: 1–9.
262. Lutz W. 1980. Teilergebnisse der Nahrungsanalysen am Waschbären (*Procyon lotor* [L.]) in Nordhessen. *Zeitschrift für Jagdwissenschaft*, 26: 61–66.
263. Lutz, W. (1981): Untersuchungen zur Nahrungsbiologie des Waschbären (*Procyon lotor* L., 1758) und zum möglichen Einfluss auf andere Tierarten in seinem Lebensraum. - Dissertation Universität Heidelberg, 238 S.
264. Manganaro, A.; Ranazzi, L.; Salvati, L. 2000. The diet of Tawny Owls (*Strix aluco*) breeding in different woodlands of Central Italy. *Buteo*, 11, 115–124.
265. Marchesi P. & Mermod C. 1989. Régime alimentaire de la martre (*Martes martes* L.) dans le Jura suisse (Mammalia: Mustelidae). *Rev. Suisse Zool.*, 96: 127-146.
266. Marchesi, L. & Sergio, F. (2005) Distribution, density, diet and productivity of the scops owl *Otus scops* in the Italian Alps. *Ibis*, 147(1), 176–187
267. Marchesi, P. 1989. Ecologie et comportement de la martre (*Martes martes* L.) dans le Jura suisse. Dissertation, Université de Neuchâtel, Switzerland.
268. Marchesi, L.; Pedrini, P.; Sergio, F. 2002 Biases associated with diet study methods in the Eagle Owl. *J. Raptor Res.*, 36, 11–16.
269. Marchesi, L.; Sergio, F.; Pedrini, P. 2022. Costs and benefits of breeding in human-altered landscapes for the eagle owl *Bubo bubo*. *Ibis*, 144, 164–177.
270. Marchesi, L.; Sergio, F.; Pedrini, P. 2006. Implications of temporal changes in forest dynamics on density, nest-site selection, diet and productivity of tawny owls *Strix aluco* in the Alps. *Bird Study*, 53, 310–318.
271. Marchewka A. (Institute of Systematics and Evolution of Animals, Cracow, Poland). Personal communication.
272. Markov G, Lanszki J (2012) Diet composition of the golden jackal, *Canis aureus* in an agricultural environment. *Folia Zool* 61(1):44–48
273. Martin Y., Riols C., 2017. Régime alimentaire du Grand-duc d'Europe (*Bubo bubo*) dans le Puy-de-Dôme et sur le prolongement du bassin de la Sioule dans le département de l'Allier (Auvergne). *Le Grand Duc*, 85: 9-30.
274. Martín Franquelo, R. (1981). *Ecología trófica del tejón (Meles meles) en la Reserva Biológica de Doñana*. Tesina de Licenciatura. Universidad de Sevilla.



275. Martinoli A. & Preatoni D.G. 1995. Food habits of the stone marten (*Martes foina*) in the upper Aveto valley (northern Apennines, Italy). *Hystrix*, 7: 137–142.
276. Martinoli, A.; Preatoni, D.G.; Chiarenzi, B.; Wauters, L.A.; Tosi, G. 2001. Diet of stoats (*Mustela erminea*) in an Alpine habitat: The importance of fruit consumption in summer. *Acta Oecol.* 22, 45–53.
277. März R. 1940 Querschnitt durch eine mehrjarige Nahrungskontolleeiniger Uhupaare. Beitr. Fortpfl. Biol. Vogel, 16: 4–6, Teil I bis V, p. 125–135, p. 166–173, p. 213–222.
278. März R. 1963. Nachweise von Schläfern aus Gewöllen. *Beiträge zur Vogelkunde*, 8: 388–396.
279. Massa B., Lo Valvo F., Siracusa M., Ciaccio A. 1991. Il Lanario (*Falco biarmicus feldeggii* Schegel) in Italia: Status, biologia e tassonomia. *Naturalista sicil.*, IV, XV (1-2): 27-63.
280. Mastorilli M. 2000. Winter Diet of Long-eared Owls *Asio otus* in Bergamo district - The Owl Pages.
281. Mattioli L., Capitani C., Gazzola A., Scandura M., Apollonio M. 2011. Prey selection and dietary response by wolves in a high-density multi-species ungulate community, *Eur. J. Wildl. Res.* 57: 909–922
282. Meyer, H. 2006. Ein Spitzenjahr des Raufußkauzes *Aegolius funereus* auf der Münchner Schotterebene. *Ornithol. Anz.*, 45: 55–61.
283. Meriggi A., Rosa P., Brangi A. & Matteucci C. 1991. Habitat use and diet of the wolf in northern Italy. *Acta Theriologica*, 36: 141–151.
284. Mestre, H. M. (2012). *The effect of habitat fragmentation in the diet of pine marten*. Doctoral dissertation. University of Lisboa.
285. Mikusek R., Kloubec B. & Obuch. J. 2001. Diet of the pygmy owl (*Glaucidium passerinum*) in eastern Central Europe. *Buteo*, 12: 47–60.
286. Milanese P., Meriggi A. & Merli E. 2012. Selection of wild ungulates by wolves *Canis lupus* (L. 1758) in an area of the Northern Apennines (North Italy). *Ethology, Ecology & Evolution*, 24: 81–96.
287. Miltshev, B. & V. Georgiev (2009): Influence of vole population peaks and the use of rodenticides on the diet of Barn Owl *Tyto alba* (Scopoli 1769) during the breeding season in south-east Bulgaria. *Egretta* 50: 82-87
288. Milchev, B. & Georgiev, V. 2012. Roach's Mouse-tailed Dormouse *Myomimus roachi* distribution and conservation in Bulgaria. – *Hystrix* 23: 67–71
289. Milchev, B.; Georgiev, V. 2019. Food spectrum and predominant prey in the diet of the eagle owl *Bubo bubo* population in Southeastern Bulgaria. *For. Ideas*, 25, 56–69.
290. Milchev, B. & Georgiev, V. 2020. Temporal and spatial dietary shifts of a generalist top predator: long-term study of an Eagle Owl *Bubo bubo* population. – *Forestry Ideas* 26: 366–379.

291. Milchev, B. & Gruychev, G. 2015. Why does the Eagle Owl, *Bubo bubo* (L.), breed rarely in the Kazanlak Valley, Central South Bulgaria? – *Acta Zoologica Bulgarica* 67: 67–74.
292. Milchev B, Ivanov T (2016) Winter diet of long-eared owls *Asio otus* (L.) in a suburban landscape of North-Eastern Bulgaria. *Acta Zool Bulg* 68:355–361
293. Milchev B (2012) New localities of small mammals (Mammalia: Eulipotyphla, Rodentia) from the Barn Owl (*Tyto alba*) diet in the Kazanlak Valley (Central South Bulgaria). *Forestry Ideas* 18: 203–208.
294. Milchev B (2015) Diet of Barn Owls *Tyto alba* in Central South Bulgaria as influenced by landscape structure. *Turkish Journal Zoology* 39: 933–940.
295. Milchev B (2022) Effects of a forest landscape on the prey composition of the Common Barn-owl *Tyto alba* in southern Bulgaria. *Travaux du Muséum National d'Histoire Naturelle "Grigore Antipa"* 65(1): 141–149.
296. Milchev, B. 2016. Dietary comparison of coexisting Barn Owl (*Tyto alba*) and Eagle Owl (*Bubo bubo*) during consecutive breeding seasons. – *Animal Biology* 66: 219–228.
297. Milchev, B. & Spassov, N. 2017. First evidence for carrion-feeding of Eurasian Eagle-owl (*Bubo bubo*) in Bulgaria. *Ornis Hungarica* 25(1): 58–69.
298. Miltshev B, Boev Z, Georgiev V (2004) Die Nahrung der Schleiereule (*Tyto alba*) in Südost-Bulgarien. *Egretta* 47: 66–77.
299. Möckel R. 1983. Zur Verbreitung und Brutökologie des Rauhfusskauzes *Aegolius funereus* (L.) im Westerzgebirge. *Beitr. Vogelkd.* 29: 137–151.
300. Möckel R. 1988. Zur Verbreitung, Häufigkeit und Ökologie der Haselmaus (*Muscardinus avellanarius*) im Westerzgebirge. *Säugetierkundliche Informationen*, 2 (12): 569–588
301. Montanari P., 1995. Dieta di Barbagianni, *Tyto alba*, e comparazione con Allocco, *Strix aluco*, in un sito delle colline piacentine. *Riv. ital. Ornitol.*, 65: 21-28.
302. Moreno, S. 2017. Lirón careto – *Eliomys quercinus*. In *Enciclopedia Virtual de los Vertebrados Españoles*; Salvador, A., Barja, I., Eds.; Museo Nacional de Ciencias Naturales: Madrid, Spain. Available online: <http://www.vertebradosibericos.org/>
303. Mori E, Menchetti M, Camporesi A, Caviglioli L, Tabarelli de Fatis K, Girardello M (2019) License to kill? Domestic cats affect a wide range of native fauna in a highly biodiverse Mediterranean country. *Front Ecol Evol* 7:477.
304. Morimando, F., Pezzo, F. & Draghi, A. (1997). Food habits of the Lanner Falcon (*Falco biarmicus feldeggii*) in Central Italy. *Journal of Raptor Research* 31, 40–43.
305. Morimando F., Pezzo F. & Draghi A. 1997. Food habits of the lanner falcon (*Falco biarmicus feldeggii*) in central Italy. *Journal of Raptor Research*, 31: 40–43.
306. Morris P. 2004. *Dormice*. Stowmarket: Whittet Books.
307. Mráz L. 1987. Small mammals in the food of owls on the territory of south Bohemia. *Lynx (Praha)*, 23: 63–74

308. Murariu D., Anureescu I., Nesterov V. 1991. Les composants de la nourriture d'hiver *Asio otus otus* (L., 1758) du nord-est de Rucarest (Roumanie). *Trav. Mus. Hist. nat. ct Grigore Antipa*, 31: 415–420.
309. Naglov (1996) cited in Yatsiuk 2011, Fig. 4
310. Najbar, B. 2007. Food habits of *Zamenis longissimus* (Laurenti, 1768) (Reptilia: Serpentes: Colubridae) in Bieszczady (southeastern Poland). *Vertebrate Zoology* 57:73–77.
311. Nedyalkov N. 2013 New records of some rare rodents (Mammalia: Rodentia) from South-East Bulgaria. *ZooNotes* 39: 1–4.
312. Nedyalkov, N.; Popgeorgiev, G.; Staneva, A. 2018. Updated distribution of the elusive Roach's mouse-tailed dormouse, *Myomimus roachi* Bate, 1937 (Mammalia: Rodentia: Gliridae) in Bulgaria. *Hist. Nat. Bulg.*, 29, 3–8.
313. Nelson, S.H., Evans, A.D., Bradbury, R.B., 2005. The efficiency of collar-mounted devices in reducing cat predation of wildlife by domestic cats. *Applied Animal Behaviour Science* 94, 273–285
314. Nistoreanu, V., & Larion, A. 2020. Importance of long-eared owl (*Asio otus* L.) in rodent regulation number in urban areas. *Scientific Papers. Series A. Agronomy*, Vol. LXIII, No. 2: 294–299.
315. Nistoreanu V. 2007. The importance of the long-eared owl *Asio otus* (L.) in rodent control. *Bulletin USAMV-CN*, 63: 424–429.
316. Nistoreanu, V., Paraschiv D., Larion A. 2020. Comparative analysis of long-eared owl (*Asio otus*) winter diet from two European cities, Chisinau and Bacau. *One Health & Risk Management*, 1 (105): 50–57.
317. Nockemann & Pfennig 1991 cited in Kampfer-Lauenstein & Lederer 2010
318. Noga, M. 2007. *Zimovanie a potravná ekológia myšiarok ušatých na juhozápadnom Slovensku*. Diplomová práca. PRIF UK Bratislava. 170 s.
319. Obuch J. & Benda P. 1996. Contribution to the feeding ecology of *Strix aluco* and *Bubo bubo* (Aves: Strigiformes) in southwestern Bulgaria. *Acta Societatis Zoologicae Bohemicae (Praha)*, 60: 43–49.
320. Obuch J. & Benda P. 2009. Food of the barn owl (*Tyto alba*) in the eastern Mediterranean. *Slovak Raptor Journal*, 3: 41–50.
321. Obuch J. & Karaska D. 2010. The Eurasian eagle-owl (*Bubo bubo*) diet in the Orava region (N Slovakia). *Slovak Raptor Journal*, 4: 83–98.
322. Obuch J. & Matis Š. 1998. Načrt potravy plamienky driemavej (*Tyto alba*) v Košickej kotline. *Natura Carpatica*. 39: 263–272.
323. Obuch J. 1988. Drobní savci v potravě puštika obecného v Pošumaví. *Lynx*, n.s. 24: 5–14.
324. Obuch J 1994a: Potrava sovy obyčejnej (*Strix aluco*) v niektorých oblastiach Čiech a Moravy [Diet of tawny owl (*Strix aluco*) in selected regions of Bohemia and Moravia]. *Sylvia* 30: 77–85.

325. Obuch J. 1997: Dlhodobé sledovanie potravy sovy obyčajnej (*Strix aluco*) na Muránskej planine [Long-term investigation of the food of *Strix aluco* in the Muránska planina Mts.], 93–100. In: Uhrin M (ed.): Výskum a ochrana prírody Muránskej planiny. Revúca, 119.
326. Obuch J. 1998. Dormice in the diet of owls in Slovakia. *Lynx (Praha)*, 29: 31–41
327. Obuch J. 2004. Types of diet of tawny owl in the Muránska planina National Park. *Reussia*, 1 (suppl. 1): 299–309
328. Obuch J. 2007. Food of the Raven (*Corvus corax*) in Slovakia. *Tichodroma*, 19: 1–10
329. Obuch J. 2011. Spatial and temporal diversity of the diet of the tawny owl (*Strix aluco*). *Slovak Raptor Journal*, 5: 1–120.
330. Obuch J. 2021 Temporal changes in proportions of small mammals in the diet of the mammalian and avian predators in Slovakia. *Lynx*, n. s. (Praha), 52: 87–104.
331. Obuch J. 2021. Spatial and temporal changes in the diet composition of the Eurasian eagle-owl (*Bubo bubo*) in Slovakia comparing three historical periods. *Raptor Journal*. 15 (1): 17–55.
332. Obuch J., Danko Š., Mihók J., Karaska D. & Šimák L. 2013. Diet of the Ural owl (*Strix uralensis*) in Slovakia. *Slovak Raptor Journal*, 7: 59–71.
333. Obuch J. Danko Š. & Noga M. 2016. Recent and subrecent diet of the Barn owl (*Tyto alba*) in Slovakia. *Slovak Raptor Journal* 10: 1–50.
334. Oeser R. 1972. Weiteres Brutvorkommen des Rauhfusskauzes (*Aegolius funereus*) bei Raschau im Erzgebirge. Beitr. Vogelkd., 18:436–437.
335. Ognev S.I. 1947. *Zveri SSSR i prilozhashchikh stran. Gryzuny* [The mammals of the USSR and adjacent countries. Rodents]. Vol. 5. Moskva – Leningrad: Izdatel'stvo Akademii nauk SSSR
336. Ortega, A., Casado, S. (1991). Alimentación invernal del milano real (*Milvus milvus*) en la provincia de Madrid. *Doñana, Acta Vertebrata*, 18 (2): 195-204.
337. Osti F. 1979. Ulteriore contributo allo studio delle abitudini alimentari dell'Orso bruno delle Alpi (*Ursus arctos* L.). *Natura alpina*, 17: 39-48.
338. Padial, J. M., Vila A. & Gil-Sanchez J. M. (2002). Feeding habits and overlap among red fox (*Vulpes vulpes*) and stone marten (*Martes foina*) in two Mediterranean mountain habitats. *Mammalian Biology* 67, 137–146.
339. Pailley, M. & Pailley, P. 2000. Le régime alimentaire de la Chouette effraie *Tyto a. alba* en Maine-et-Loire. *Crex* 5: 41–53.
340. Paliocha E. & Turni H. 2003. Gewöllanalyse. In: Braun M. & Dieterlen F. (Hrsg.). *Die Säugetiere Baden-Württembergs*. Bd 1: Allgemeiner Teil, Fledermäuse (Chiroptera). Stuttgart: Ulmer, 68–86.
341. Palomares, F., Delibes, M. (1991). Alimentación del meloncillo *Herpestes ichneumon* y de lagineta *Genetta genetta* en la reserva biológica de Doñana, S. O. de la península ibérica. *Doñana, Acta Vertebrata*, 18 (1): 5-20.

342. Palomares, F., Delibes, M. (1991). Dieta del meloncillo, *Herpestes ichneumon*, en el Coto del Rey (norte del Parque Nacional de Doñana, S. O. de España). *Doñana, Acta Vertebrata*, 18 (2): 187-194.
343. Paralikidis, N. P., Papageorgiou, N. K., Kotsiotis, V. J., & Tsiompanoudis, Z. C. (2010). The dietary habits of the brown bear (*Ursus arctos*) in western Greece. *Mammalian Biology*, 75, 29– 35.
344. Paspali G., Bego F. 2014. Data from the pellet analysis of the Barn Owl (*Tyto alba*) in the southern region of Albania. *Jornal of Institute Alb-Shkenca*. 7 (1): 68-72.
345. Paspali G., Oruçi S., Koni M., Wilson I.F., Kryštufek B. & Bego F. 2013. Seasonal variation of small mammals in the diet of the barn owl (*Tyto alba*). in the Drinos River valley, southern Albania. *Turkish Journal of Zoology*, 37: 97–105.
346. Paspali G., Hysaj E. & Bego F. 2015. Mammal prey in the pellets of the little owl, *Athene noctua*. Data from the Antigone Commune, Gjirokastër, Albania. In: Mankolli H. *et al.* (eds.). 5<sup>th</sup> International conference of ecosystems. Proceedings Book. Tirana, Albania: 174–178.
347. Patriarca E., Debernardi P. 1999. Dieta di Civetta capogrosso *Aegoliu sfunereus* nel Parco Nazionale Gran Paradiso in periodo tardo primaverile ed estivo. Considerazioni su disponibilità e selezione dei mammiferi-preda. *Avocetta* 23: 105.
348. Pedenko A.S. 2020. Diet of the Tawny Owl in the Prioksko-Terrasny Nature Biosphere Reserve during the spring-summer period. Хищные птицы Северной Евразии, Воронеж.
349. Pedrini P. & Sergio F. 2001. Density, productivity, diet, and human persecution of golden eagles (*Aquila chrysaetos*) in the central-eastern Italian Alps. *The Journal of Raptor Research*, 35: 40–48.
350. Pedrini P. & Sergio F. 2002. Regional conservation priorities for a large predator: golden eagles (*Aquila chrysaetos*) in the Alpine range. *Biological Conservation*, 103: 163–172.
351. Pedrini P., 1982 - L'alimentazione di un Allocco (*Strix aluco* L.) nel Trentino. Studi trent. Sci. nat. (Acta biologica), 59: 221-226.
352. Pedrini, P., Prigioni, C. & Volcan, G. 1995. Use of trophic resources and forest habitats by the genus *Martes* in Adamello-Brenta Park (Central Italian Alps). - *Hystrix* 7: 127-135.
353. Penezić A. & Ćirović D. 2015a. Seasonal variation in diet of the golden jackal (*Canis aureus*) in Serbia. *Mammal Research*, 60: 309–317.
354. Penezić A., Ćirović D. 2015b. Seasonal variation in diet of the golden jackal (*Canis aureus*) in Serbia. *Mammal Research*. 60(4):309–317.
355. Penteriani, V., Gallardo, M., Roche, P., & Cazassus, H. (1999). Le Grand-Duc d'Europe *Bubo bubo* dans le massif du Luberon–Densité, préférence en termes d'habitat de nidification, régime alimentaire, comportement vocal. *Courrier scientifique du Parc naturel régional du Luberon et de la Réserve de biosphère Luberon-Lure*.

356. Penteriani, V., Sergio, F., del Mar Delgado, M., Gallardo, M. & Ferrer, M. 2005. Biases in population diet studies due to sampling in heterogeneous environments: a case study with the Eagle Owl. *J. Field Ornithol.* 76: 237–244
357. Pérez-Mellado, V. (1980). Alimentación del búho real (*Bubo bubo* L.) en España central. *Ardeola*, 25: 93-112.
358. Petretti F. 1977. Seasonal food habits of Barn Owl (*Tyto alba*) in an area of central Italy. *Gerfaut*, 67: 225-234.
359. Petrovici, M., Molnar, P., Sándor A.D. (2013): Trophic niche overlap of two sympatric owl species (*Asio otus* Linnaeus, 1758 and *Tyto alba* Scopoli, 1769) in North-Western part of Romania. *North Western Journal of Zoology* 9: art.131602.
360. Petrovics Z. & Solti B. 2016. Adatok az uhu (*Bubo bubo*) északkelet-magyarországi állományának táplálkozásához. *Regionális védelem, felmérések / Regional protection and monitoring. Heliaca*, 98–104.
361. Pezzo F. & Morimando F. 1995. Food habits of the barn owl, *Tyto alba*, in a Mediterranean rural area: comparison with the diet of two sympatric carnivores. *Bolletino di Zoologia*, 62: 369–373.
362. Pikulska B. & Mikusek M. 1997. Popielica (*Glis glis* L.) w pokarmie sów z terenu Gór Stołowych. Fat dormouse in the food of owls from the area of Stolowe Mountains. *Przegląd Zoologiczny*, XLI, 1-2: 109–111
363. Pikulska B., Mikusek R. 2007. Popielicowate (Rodentia, Gliridae) Parku Narodowego Gór Stołowych. *Przyr. Sud.* 10: 181-188.
364. Pinchera F., 1987 - Note sull'alimentazione dell'Allocco, *Strix aluco*, nell'Appennino Abruzzese. *Riv. ital. Ornitol.*, 57: 141-144.
365. Pirovano A., Rubolini D., Brambilla S. & Ferrari N. (2000) Winter diet of urban roosting Long-eared Owls *Asio otus* in northern Italy: the importance of the Brown Rat *Rattus norvegicus*. *Bird Study*, 47:2, 242-244.
366. Pokorný J (2000) The diet of the Tengmalm's Owl (*Aegolius funereus*) in Northbohemian mountain areas damaged by immissions. *Buteo* 11:107–114
367. Pokorný J, Kloubec B, Obuch J (2003) Comparison of Tengmalm's Owl *Aegolius funereus* diet in several Czech mountain areas. *Vogelwelt* 124:313–323
368. Poláček, M.; Baláž, M.; Obuch, J. 2012. Diet of the tawny owl (*Strix aluco*) in urban and forest environment. *Tichodroma*, 24, 29–39.
369. Polak, S. 1994. Feeding habits of the stone marten (*Martes foina* Rxleben, 1777) in the surroundings of Knežak. Graduation thesis, BTF, Univerza v Ljubljani, 51 pp.
370. Polak, S. 1997. The use of caves by the edible dormouse (*Myoxus glis*) in the Slovenian karst. *Nat. Croat.*, 6, 313–321.
371. Polini N., Canzian F. 2017. Analisi comparativa (2004-2012) sui cambiamenti della biodiversità di specie presenti nelle borre di barbagianni (*Tyto alba*) in un sito delle marche. *Scritti in onore di Franco Pedrotti. Collana Natura e aree protette.* 32: 122-129.
372. Popov (1960) cited in Ognev (1947), Ivashkina (2006)
373. Popov V., Nedyalkov N. 2013 The mouse-tailed dormouse (*Myomimus roachi*) – general report. *Natura 2000, Bulgaria*, 32 pp. (In Bulgarian)

[http://natura2000.moew.government.bg/PublicDownloads/Auto/SDF\\_REF\\_SPECIES/2617/2617\\_Species\\_102.zip](http://natura2000.moew.government.bg/PublicDownloads/Auto/SDF_REF_SPECIES/2617/2617_Species_102.zip).

374. Prete, S., C. Battisti, F. Marini and P. Ciucci. 2012. Applying abundance/biomass comparisons on a small mammal assemblage from Barn owl (*Tyto alba*) pellets (Mount Soratte, central Italy): a cautionary note. *Rend. Lincei-Sci. Fis.* 23:349–354.
375. Prigioni C. & De Marinis A.M. 1995. Diet of the polecat *Mustela putorius* L. in riverine habitats (northern Italy). *Hystrix*, 7: 69–72.
376. Prigioni C., Balestrieri A., Remonti L. & Cavada L. 2008. Differential use of food and habitat by sympatric carnivores in the eastern Italian Alps. *Italian Journal of Zoology*, 75: 173–184.
377. Prostkov N.I. & Komarova N.I. 2009. Pitanije i biotopičeskoe raspredelenije lesnoj kunicy (*Martes martes* L.) v uslovijach Usmanskogo bora i smežnych territorij Voronežskoj i Lipeckoj oblasti. *Vestnik VGU*. 2: 116–123.
378. Pukinskii J.B. 1977. *Zhizn' sov [The life of owls]*. Leningrad: Izdatel'stvo Leningradskogo universiteta.
379. Purger & Horváth 2003  
<https://www.yumpu.com/hu/document/read/4419100/fofia-comloensis-tom>
380. Purger, J. J. 2005: Kaposvár és környékének (Somogy megye) kisemlős faunája, gyöngybagoly *Tyto alba* (Scopoli, 1769) köpetek vizsgálatá alapján. - *Folia Historico Naturalia Musei Matraensis* 29: 203-215
381. Radovic, A., Kovačič, D., 2010. Diet composition of the golden jackal (*Canis aureus* L.) on the Peljesac Peninsula, Dalmatia, Croatia. *Period. Biol.* 112, ~ 219–224.
382. Rajković D. Z. 2018. Diet composition and prey diversity of Tengmalm's owl *Aegolius funereus* (Linnaeus, 1758; Aves: Strigidae) in central Serbia during breeding. *Turkish Journal of Zoology*. 42: 346-351.
383. Ratajc U, Breskvar M, Džeroski S, Vrezec A (2022) Differential responses of coexisting owls to annual small mammal population fluctuations in temperate mixed forest. *Ibis* 164:535–551
384. Rathgeber, C.; Bayle, P. 1997. Régime alimentaire du grand duc d'Europe, *Bubo bubo*, en période de reproduction, dans la région de menton (Alpes-Maritimes, France). *Avocetta*, 20, 12–25.
385. Ravussin, P. A. 2014. La Chouette de Tengmalm dans le Jura franco-suisse: bilan de 30 années de suivi. Conference: Petite chouettes de montagne. Chevêchette et Tengmalm. At: Sarrebourg, France. Volume: 14 & 15, août 2014.
386. Ravussin, P.-A., D. Trollet, C. Daenzer, L. Longchamp, K. Romailier & V. Métraux (2015) : Quel avenir pour la Chouette de Tengmalm *Aegolius funereus* dans le massif du Jura. *Bilan de trente années de suivi. Nos Oiseaux* 62 : 5-28.
387. Ravussin, P.-A, Henrioux, P., Henrioux, F., Trollet, D., Longchamp, L., Morel, J., Beaud, M., 2016. Régime alimentaire de la Chouette de Tengmalm *Aegolius funereus* dans le massif du Jura. *Nos Oiseaux* 63(3), n. 525, 215-226.

388. Real, J., Galobart, A., & Fernández, J. 1985. Estudi preliminar d'una població de Duc (*Bubo bubo*) al Vallès i Bages. Medi natural del Vallès, 175-187.
389. Rehage H.-O. & Steinborn G. 1984. Haselmaus – *Muscardinus avellanarius* (Linnaeus, 1758). In: Schröpfer R., Feldmann R. & Vierhaus H. (Hrgs.). *Die Säugetiere Westfalens*. Münster: Westfälisches Museum für Naturkunde, Landschaftsverband Westfalen-Lippe, 172–181.
390. Reig, S. & Jedrzejewski, W. (1988). Winter and early spring food of some carnivores in the Białowieża National Park, eastern Poland. *Acta Theriologica* 33, 57–65.
391. Reiter A, Hanák V, Benda P & Obuch J 1997: Savci Národního parku Podyjí [Mammals of the Podyjí National Park]. *Lynx*, n.s. 28: 5–141.
392. Remonti L., Balestrieri A. & Prigioni C. 2007. Role of fruits in the diet of small mustelids (*Mustela* sp.) from the western Italian Alps. *European Journal of Wildlife Research*, 53: 35–39.
393. Remonti L., Prigioni C., Balestrieri A., Sgrosso S. & Priore G. 2008. Trophic flexibility of the otter (*Lutra lutra*) in southern Italy. *Mammalian Biology*, 73: 293–302.
394. Remonti L., Balestrieri A., Ruiz-González A., Gómez-Moliner B.J., Capelli E. & Prigioni C. 2012. Intraguild dietary overlap and its possible relationship to the coexistence of mesocarnivores in intensive agricultural habitats. *Population Ecology*, 54: 521–532.
395. Riedel W. 1989. Zur Ernährung des Waldkauzes (*Strix aluco*) in zwei Untersuchungsgebieten des mittleren Neckarraumes. *Orn. Jh. Bad.-Württ.* 5: 91-98.
396. Rigaux, P. & Riols, C. 2008. Régime alimentaire de l'Effraie des clochers (*Tyto alba*) à Courpière, Val de Dore (Puy-de-Dôme). *Le Grand Duc* 72: 27–29.
397. Romanowski J. & Żmihorski M. 2009. Seasonal and habitat variation in the diet of the tawny owl (*Strix aluco*) in Central Poland during unusually warm years. *Biologia*, 64: 365–369.
398. Rossolimo O.L., Potapova E.G., Pavlinov I.Ya., Kruskop S.V. & Voltzit O.V. 2001. *Soni (Myoxidae) mirovoi fauny [Dormice (Myoxidae) of the world]*. Moskva: Izdatel'stvo Moskovskogo universiteta.
399. Rosalino, L. M., Santos-Reis M. 2002. Feeding habits of the common genet *Genetta genetta* (Carnivora: Viverridae) in a seminatural landscape of central Portugal. *Mammalia* 66:195–205
400. Rosellini, S., Barja, I., and Piñeiro, A. (2007). Distribución y hábitos alimenticios de la marta (*Martes martes*) en el parque natural os montes do invernadeiro (Galicia, NO de España). *Galemys* 19, 99–114.
401. Rosellini S, Osorio E, Ruiz-Gonzales A, Piñeiro A, Barja I (2008) Monitoring the small-scale distribution of sympatric European pine martens (*Martes martes*) and stone martens (*Martes foina*): a multievidence approach using faecal DNA analysis and cameratraps. *Wildl Res* 35:434–440



402. Roulin A. 1996. Alimentation hivernale de la Chouette effraie (*Tyto alba*), du Hibou moyen-duc (*Asio otus*), du Busard Saint-Martin (*Circus cyaneus*) et du Faucon crécerelle (*Falco tinnunculus*). *Bull. Soc. Vaudois Sci. Nat.* 84: 19–32.
403. Roulin, A. 2004. Covariation between plumage color polymorphism and diet in the Barn Owl *Tyto alba*. *Ibis* 146: 509– 517.
404. Rugiero, L., Milana, G., Capula, M., Amori, G. & Luiselli, L. (2012). Long term variations in small mammal composition of a snake diet do not mirror climate change trends. *Acta Oecologica* 43, 158-164
405. Ruiz, R. (1996). Variaciones geográfica y temporal en la dieta de la lechuza campestre (*Asio flammeus*) en Europa. *Doñana, Acta Vertebrata*, 23 (1): 5-20.
406. Ruiz-Olmo, J., Palazón, S. (1993). Diet of the stone marten (*Martes foina* Erxleben, 1777) in the northeastern Spain. *Doñana, Acta Vertebrata*, 20 (1): 59-67.
407. Ruiz-Olmo J, Nadal J (1991) Régime alimentaire de la martre (*Martes martes* L., 1758) en hiver et taille des portées à Ménorca, Iles Baléares. *Mammalia* 55:639–642.
408. Rumbutis S. 1982. [Data on diet of the long-eared owl (*Asio otus*) and the tawny owl (*Strix aluco*) in the lowland of central Lithuania]. In: Budrys R. *et al.* (eds.) *Ekologicheskie issledovaniya i okhrana ptits Pribaltiiskikh respublik [Ecological research and protection of birds in the Baltic republics]*. Kaunas, 69–73
409. Ruprecht & Szwagrzak 1986 cited in Terlecka (2012), p.69.
410. Ruprecht & Szwagrzak 1987 cited in Lesinski & Gryz (2008)
411. Russell A.J.M. & Storch I. 2004. Summer food of sympatric red fox and pine marten in the German Alps. *European Journal of Wildlife Research*, 50: 53–58.
412. Rymešová D. 2006. Složení potravy a hnízdní úspěšnost sýce rousného, *Aegolius funereus* (L., 1758), v CHKO Žďárské vrchy. *Bakalařska prace*. Brno, Masarykova univerzita, 75 pp.
413. Sackl P. & Dölmayer G, 1996. Zur Siedlungsbiologie und Ökologie des Uhus (*Bubo bubo*) im oberen Murtal(Steiermark, Österreich). *Abh. Zool. Bot. Ges. Österreich* 129; 33-45
414. Salvati, L., Manganaro, A. & Ranazzi, L. 2002. Aspects of the ecology of the Barn Owl *Tyto alba* breeding in a Mediterranean area. – *Bird Study* 49(2): 186–189.
415. Sándor, A. D. & Ionescu, D. T. 2009. Diet of the eagle owl (*Bubo bubo*) in Braşov Romania. *N.-West. J. Zool.* 5, 170–178.
416. San Segundo, C. (1988). Notas sobre la alimentación del búho chico (*Asio otus*) en Avila. *Ardeola*, 35 (1): 150-155.
417. Sarà M. & Casamento G. 1994. Distribution and ecology of dormice (*Myoxidae*) in Sicily: a preliminary account. *Hystrix*, 6: 161–168.
418. Sarà, M.; Zanca, L. 1989. The feeding habits of the tawny owl *Strix aluco* in Sicily and in Aspromonte (Calabria). *Avocetta*, 13, 31–39.
419. Savarin, A. A., Kitel D.A. 2016. On clarification of finding of hazel dormouse (*Muscardinus avellanarius*) in the south-west of Belarus. *Proceedings of the F. Scorina Gomel State University*, 6 (99): 120–121.

420. Savarin, A., & Kitel, D. (2020). Small mammals in the diet of long-eared owl (*Asio otus*) in the southwest of Belarus. *Theriologia Ukrainica*, 19: 130–137.
421. Saviozzi, P., and M.A.L. Zuffi. 1997. An integrated approach to the study of the diet of *Vipera aspis*. *Herpetological Review* 28:23–24.
422. Scaravelli D. & Aloise G. 1994. Predation on dormice in Italy. *Hystrix*, 6: 245–255.
423. Scaravelli D., Casini L. & Matteucci C. 1994. Dormice distribution in Romagna region (Italy). *Hystrix*, 6: 195–198
424. Schäfer H. 1938. Wovon ernährt sich der Uhu im Gebirge. *Beitr. Fortpfl. Biol. Vogel*, 14: 21–25.
425. Schauenberg P. 1981. Elements d'écologie du chat forestier d'Europe *Felis silvestris* Schreber, 1777. *Revue d'Ecologie (Terre et Vie)* 35: 3–36.
426. Schelper 1989 cited in Kampfer-Lauenstein & Lederer 2010
427. Scherzinger W 1974: Zur Ökologie des Sperlingskauzes *Glaucidium passerinum* im Nationalpark Bayerischer Wald. *Anz Orn Ges Bayern* 13(2): 121–156
428. Schmidt E. 1975. Die Ernährung der Waldohreule in Europa. *Aquila* 80/81: 221–238
429. Schönn, S. (1976): Vierjährige Untersuchungen der Biologie des Sperlingskauzes, *Glaucidium p. passerinum* (L), im oberen Westerzgebirge. *Beitr. Vogelkd. Leipzig* 22, 261–300.
430. Schweiger, A. & Lipp, L. (2011) Wühlmäuse (Arvicolinae) als bevorzugte Beute des Uhus *Bubo bubo* während der Jungenaufzucht in Bayern. *Ornithol. Anz.*, 50, 1–25.
431. Schwerdfeger 1988 cited in Kampfer-Lauenstein & Lederer 2010
432. Sergio F., Marchesi L., Pedrini P. & Peneteriani V. 2007. Coexistence of a generalist owl with its intraguild predator: distance-sensitive or habitat-mediated avoidance? *Animal Behaviour*, 74: 1607–1616.
433. Sergio F., Marchesi L. & Pedrini P. 2008. Density, diet and productivity of long-eared owls *Asio otus* in the Italian Alps: the importance of *Microtus voles*. *Bird Study*, 55: 321–328.
434. Serrano-Larraz, D. (1998). Diferencias interhábitat en la alimentación del búho real (*Bubo bubo*) en el valle medio del Ebro (NE de España): efecto de la disponibilidad de conejo (*Oryctolagus cuniculus*). *Ardeola*, 45 (1): 35–46.
435. Sharikov A.V., Kholopova A.V., S.V. Volkov, Makarova T.V. 2009. The review of owls' diet in Moscow City and Moscow Region. In: *Sovi Severnoj Evrazii: ekologija, prostranstvennoje biotopičeskoje raspredelenije*. Moskva, 188–203.
436. Shnarevich 1959) - cited in Lozan et al. 1990, page 126
437. Sidiropoulos, L.; Whitfield, D.P.; Astaras, C.; Vasilakis, D.; Alivizatos, H.; Kati, V. 2022. Pronounced Seasonal Diet Diversity Expansion of Golden Eagles (*Aquila chrysaetos*) in Northern Greece during the Non-Breeding Season: The Role of Tortoises. *Diversity*, 14, 135.

438. Sidorovich, V. E. (2011). Analysis of vertebrate predator-prey community: Studies within the European Forest zone in terrains with transitional mixed forest in Belarus. Minsk, Tesey
439. Sidorovich, A.A.; Ivanovskij, V.V.; Sidorovich, V.E.; Solovej, I.A. 2016. Landscape-related variation in the diet composition of the common buzzard (*Buteo buteo*) in Belarus. *Slovak Raptor J.* 10, 65–74.
440. Sidorovich VE, Polozov AG, Solovej IA (2008). Niche separation between the weasel *Mustela nivalis* and the stoat *M. erminea* in Belarus. *Wildlife Biology* 14, 199–210.
441. Simeonov S.D., Boev Z.N. 1988. A study of the nutritive spectrum of the eagle owl (*Bubo bubo* L.) in Bulgaria. *Ekologija, Sofija*. 21: 47-56.
442. Simeonov (1964, 1966) cited In Schmidt (1974)
443. Simeonov, S., Milchev, B. & Boev, Z. (1998). Study of the eagle owl (*Bubo bubo* L.) (Aves: Strigiformes) in the Strandzha Mountain (southeast Bulgaria). II. Food spectrum and trophic specialization. *Acta Zool. Bulg.* 50: 87–100
444. Siracusa M. & Ciacchio A. 1985. Dieta del Barbagianni *Tyto alba* e sue variazioni stagionali in un'area della sicilia sud-occidentale. *Riv. ital. Orn.*, 55: 15 1-160.
445. Sladek (1973) - cited in Schauenberg 1981 (Table 1)
446. Sokur (1960) cited in Lozan et al. 1990, p.126
447. Šotnár K & Obuch J 1998: Potravná ekológia myšiarky ušatej (*Asio otus*) v okolí Bojníc na strednom Slovensku [Feeding ecology of long-eared owl (*Asio otus*) in the vicinity of Bojnice (Central Slovakia)]. *Buteo* 10: 89–96.
448. Šotnar K. 2000. A contivution to the breeding biology and feeding ecology of the Goshawk (*Accipiter gentilis*) in the Horne Ponitrie Region, Slovakia. *Buteo*, 11: 43–50.
449. Šotnár K., Krištín A., Sárossy M. & Harvančík S. 2008: On foraging ecology of the scops owl (*Otus scops*) at the northern limit of its area. *Tichodroma* 20: 1–6
450. Šotnár K., Pačenovský S. & Obuch J. 2015. On the food of the Eurasian pygmy owl (*Glaucidium passerinum*) in Slovakia. *Slovak Raptor Journal*, 9: 115–126.
451. Spangenberg 1925 – cited in Ognev (1947, p. 518)
452. Spangenberg E. P. 1935. Sonia-polčiók (*Glis glis*). Moskva-Leningrad. 36–70.
453. Stahl P. (1986). Le Chat forestier d'Europe (*Felis silvestris*, Schreber, 1777): exploitation des ressources et organization spatiale. Ph.D Thesis, Univ. Nancy.
454. Stanko et al. (1995) cited in Tulis 2011, Table 2
455. Stasiak, K., Kitowski, I., Wisniowski, R., Pitucha, G., Krawczyk, R., Cios, S., Grzywaczewski, G. & Bashta, A-T. 2012. Food composition of Long-eared Owl (*Asio otus*) from Poland and Ukraine during non-breeding season. – *Berkut* 21(1–2): 93–97
456. Stojanov et al. (2011) cited In Cattaneo et al. 2013
457. Stolarz P., Stolarz J., Lesiński. G. 2017. Seasonal changes in the diet of the Long-eared Owl *Asio otus* in the lower Pilica River valley. *Przegląd Przyrodniczy*, 28: 101-106.
458. Storch, I.; Kleine, Ch.1991. Zur Nahrungswahl des Fuchses in den Voralpen. *Z. Jagdwiss.* 37, 267–270.

459. Suchy O. 2003. Development of the Montagu's Harrier (*Circus pygargus*) population in Uničov region in 1978–2000. *Buteo*, 13: 53–59.
460. Szentgyörgyi P., Vizslán T., Fügedi L. (1993): A gyöngybagoly (*Tyto alba*) nagy pele (*Glis glis*) fogyasztása. - *Calandrella* 7.1-2: 155.
461. Szép, D., Klein, Á. & Purger, J. J. 2017. The prey composition of the Barn Owl (*Tyto alba*) with respect to land-scape structure of its hunting area (Zala County, Hungary). – *Ornis Hungarica* 25(2): 51–64.
462. Szép, D., Bocz, R., & Purger, J. J. (2018). Weather-dependent variation in the winter diet of urban roosting Long-eared Owls (*Asio otus*) in Pécs (Hungary). *Avian Biology Research*, 11(1), 1–6
463. Szép, D., Klein, Á. & Purger, J. J. 2019. Investigating the relationship between the prey composition of Barn Owls (*Tyto alba*) and the habitat structure of their hunting range in the Marcal Basin (Hungary), based on pellet analysis. – *Ornis Hungarica* 27(1): 32–43.
464. Szép D., Krčmar S. & Purger J.J. 2021. Possible causes of temporal changes in the diet composition of common Barn-Owls *Tyto alba* (Scopoli, 1769) (Strigiformes: Tytonidae) in Baranja, Croatia. *Acta Zoologica Bulgarica* 73: 87–94.
465. Thelenova J., 2003: Potravni ekologie syce rousneho (*Aegolius funereus*) v Jizerských horách. Diplomova prace, PřF UP Olomouc, 78 pp.
466. Tishechkin A.K. 1997. Comparative food niche analysis of *Strix* owls in Belarus. In: Duncan J.R., Johnson D.H. & Nicholls T.H. (eds.) *Biology & conservation of owls of the Northern Hemisphere: 2nd international symposium*. General Technical Report NC-190. St. Paul, MN: USDA, Forest Service, North Central Forest Experiment Station, 456–460.
467. Tome D. 1994. Diet composition of the long-eared owl in central Slovenia: seasonal variation in prey use. *Journal of Raptor Research*, 28: 253–258.
468. Tome D 2000: Winter diet of the longeared owl *Asio otus* in Slovenia. *Acrocephalus* 21: 3–7.
469. Tomešek M., Čermak P. 2009. The food spectrum of sparrowhawk (*Accipiter nisus* L.) and kestrel (*Falco tinnunculus* L.) in the Chriby upland, the Czech Republic. *Acta Universitatis Agriculturae et Silviculturae Mendelianae Brunensis* 17:145–150
470. Torre A. 1983. Variazione stagionale dell'alimentazione del Barbagianni *Tyto ulba ernesti* nel Nord ovest della Sardegna. *Avocetta*, 7: 85-94.
471. Torre, I., Arrizabalaga, A., Freixas, L., Ribas, A., Flaquer, C. and Diaz, M. 2013. Using scats of a generalist carnivore as a tool to monitor small mammal communities in Mediterranean habitats. *Basic and Applied Ecology* 14: 155–164
472. Torre, I., Arrizabalaga, A. and Ribas, A. 2015a. The diet of the genet (*Genetta genetta* Linnaeus 1758) as a source of information on local small mammal communities. *Galemys* 27: 71–75
473. Tóth M., Bárány A., Szenczi P. 2011. The Stone Marten in Budapest. *Állattani Közlemények*, 96 (1-2): 39–59.

474. Tryjanowski P, Antczak M, Hromada M, et al. (2002) Winter feeding ecology of male and female European wildcats *Felis silvestris* in Slovakia. *Z Jagdwissenschaft* 48, 49–54.
475. Tulis, F. (Constantine the Philosopher University in Nitra, Slovakia). Personal communication.
476. Tulis F. 2011. Variegated diet composition of long-eared owl (*Asio otus*) in eastern part of Nitrianska pahorkatina – hills. In: Turcáni D. (ed.) *Young researchers 2011. PhD students, young scientists and pedagogues conference proceedings*. Nitra: Constantine the Philosopher University, 496–503.
477. Tulis F 2013 The influence of land use to diet of long-eared owl (*Asio otus*). Doctoral Thesis. Faculty of Natural Sciences. Constantine the Philosopher University in Nitra, Nitra.
478. Tulis F, Baláž M, Obuch J & Šotnár K 2015. Responses of the long-eared owl *Asio otus* diet and the numbers of wintering individuals to changing abundance of the common vole *Microtus arvalis*. *Biologia* 70: 667–673.
479. Tulis, F., Veselovský, T., Birrer, S. (2019). Different alternative diets within two subgroups in a winter roost of long-eared owls. *Raptor Journal*, 13:
480. Tulis, F., Ševčík, M. & Obuch, J. 2019. Long-eared Owls roosted in the forest, still hunted in open land. *Raptor Journal*, 13(1), 105-119.
481. Tulis F., Poljak N., Ruzic M., Obuch J. 2021. Winter diet of Long-eared Owls (*Asio otus*) in the southern Pannonian Plain (Serbia, Vojvodina). *Avian Biology Research*, 14: 113–123.
482. Turini, R. 1994. Preliminary data on the micromammals of the "Orrrido di Botri Natural Reserve" from Tawny Owl pellets and fox and weasel scat analysis. *Atti della Societa Toscana di Scienze Naturali*, Memorie Serie B, 101, 101–105.
483. Uhrin M, Benda P, Obuch J & Urban P 2002c: K poznaniu fauny cicavcov Drienčanského krasu a okolia (stredné Slovensko) [Mammal fauna of the Drienčanský kras Karst Region and surrounding areas (central Slovakia)]. *Lynx*, n. s. 33: 193–247.
484. Uhu Webcam Eifel (2015) - <https://www.youtube.com/watch?v=LWYdZZy2uwk>
485. Usberti A. 2007–2008. Reperti sull'alimentazione autunno-invernale del Gufo comune, *Asio otus* (Linnaeus), in un ambiente della pianura lombarda. Tesi di Laurea Magistrale. Università degli studi di Padova.
486. Uspenskii G.A. & Lozan M.N. 1961. [Some results of investigations on ecology of dormice (*Myoxidae*) in Moldavia]. In: *Voprosy ekologii i khozyaistvennogo znacheniya nazemnoi fauny* [Questions on ecology and economic significance of overground fauna]. Kishinev: Shtiintsa, 75–84
487. Uttendörfer O 1939: Die Ernährung der deutschen Tagraubvögel und Eulen und ihre Bedeutung in der heimischen Natur. Verlag J. Neumann, Neudamm, 412 p.
488. Uttendörfer O 1952: Neue Ergebnisse über die Ernährung der Greifvögel und Eulen. Verlag Eugen Ulmer, Stuttgart, 189.
489. Uttendörfer O. 1997. *Die Ernährung der deutschen Raubvögel und Eulen und ihre Bedeutung in der heimischen Natur*. 2 Aufl. Wiesbaden: Aula Verlag, 412 S.

490. Vacík R. 1991: Hnízdní biologie sýce rousného, *Aegolius funereus*, v Čechách a na Moravě (Breeding biology of the Tengmalm's owl in Bohemia and Moravia). *Sylvia* 28: 95–113.
491. Varuzza, P., Capizzi, D., Santini, L. & Apollonio, M. 2001. Barn Owl *Tyto alba* predation on small mammals in relation to the Mediterranean environment (Pisa Province, Italy). *Acta Ornithologica* 36(2): 153–160.
492. Vavylis, D. 2012. Diet analysis of three owl species *Tyto alba*, *Strix aluco* and *Asio otus*. Bachelor Thesis, Aristotle university of Thessaloniki, Thessaloniki, Greece.
493. Veiga, J. P. (1980). Alimentación y relaciones tróficas entre la lechuza común (*Tyto alba*) y el búho chico (*Asio otus*) en la Sierra de Guadarrama (España). *Ardeola*, 25: 113–142.
494. Verbeylen G., Andre A., Desmet A., Manzanares L., Mels B., Pulles R., Swinnen K., Vansseuningen I., Vermeiren M. et al. 2017. Nest site selection and use of other habitats by the hazel dormouse *Muscardinus avellanarius* in Voeren (Flanders). Report Natuurpunt studie 2017/3, Natuurpunt Research Department (Mammal Working Group), Mechelen, Belgium.
495. Verbeylen G. (Mammal Working Group), Mechelen, Belgium). Personal communication.
496. Wereschtschagin N.K. 1959. Mlekopitajuschtsche Kawkasa. Isd. Akad. Nauk. SSSR, Moskwa–Leningrad.
497. Vericad, J. R. 1971. Estudio faunístico y biológico de los mamíferos del Pirineo. Ph.D. Dissertation. Publicaciones del Centro Pirenaico de Biología Experimental, Volumen 4.
498. Veselovský T., Basca K., Tulis F. 2017. Barn Owl (*Tyto Alba*) Diet Composition on Intensively Used Agricultural Land in the Danube Lowland. *Acta Universitatis Agriculturae et Silviculturae Mendelianae Brunensis*, 65(1): 225–233.
499. Vetrov V., Kondratenko O. 2006. Feeding of the eagle owl, *Bubo bubo*, in Lugansk region (Eastern Ukraine). *Proceedings of Theriological School*. Vol. 7: 84–91.
500. Vietinghoff-Riesch, A. V.: Neuere Untersuchungen über die Biologie des Siebenschläfers. *Säugetierk. Mitt.* 3, 133–121 (1955).
501. Vietinghoff-Riesch A. 1960. *Der Siebenschläfer (Glis glis L.)*. Monographien der Wildsäugetiere. Band XIV. Jena: Gustav Fischer Verlag.
502. Villarán, A., Medina, C.T., 1983. Alimentación del cárabo (*Strix aluco* L., 1758) en España. *Alytes* 1, 291–306
503. Villarán, A., 2000. Análisis comparativo de la dieta de ambos sexos en el cárabo común *Strix aluco* en la Península Ibérica. *Ardeola* 47, 203–213.
504. Vlachos, C. & Papageorgiou, N., 1996. Breeding Biology and Feeding of the Lesser Spotted Eagle *Aquila pomatina* in Dadia Forest, North–eastern Greece. In: *Eagle Studies: 337–347* (B.–U. Meyburg & R. D. Chancellor, Eds.). WWGBP, Berlin, London & Paris
505. Vogel P. & Frey H. 1995. L'hibernation du muscardin *Muscardinus avellanarius* (Gliridae, Rodentia) en nature: nids, fréquence des reveils et température corporelle. *Bulletin de la Societe Vaudoise des Sciences Naturelles*, 83: 217–230.

506. Vogel (1968) cited In Cattaneo et al. 2013
507. Vrezec A, Mihelič D (2013) The Ural Owl, *Strix uralensis macroura*, in Slovenia: an overview of current knowledge on species ecology. *Rivista Italiana di Ornitologia* 82: 30–37.
508. Vrezec, A. 2016. The ecology of the Ural Owl at south-western border of its distribution (Slovenia). *Raptors Conserv.* 32, 8–20.
509. Vrezec A, Saurola P, Avotins A, Kocijančič S, Sulkava S (2018) A comparative study of Ural Owl *Strix uralensis* breeding season diet within its European breeding range, derived from nest box monitoring schemes. *Bird Study* 65 (supl 1): 85–95.
510. Wagner M., Jentzsch M. 2000. Zur Verbreitung, Populationsdynamik und Nahrungsökologie des Rauhußkauzes (*Aegolius funereus* L.) im Südharz. *Orn. Jber. Mus. Heineanum* 18: 51–70
511. Wagner, G. & Springer, M. 1970. Zur Ernährung des Uhus *Bubo bubo* im Oberengadin. *Ornithol. Beob.* 67: 77–94.
512. Ważna A., Cichocki J., Jakubiec D., Łupicki D., Nadolska-Karpińska M. 2010. Ssaki pilchowate Gliridae południowej części Ziemi Kłodzkiej. *Chrońmy Przyr. Ojcz.* 66 (3): 209–215
513. Ważna A., Cichocki J., Mierczak Z., Zwijacz-Kozica T. & Owca M. 2012. The occurrence and distribution of the common dormouse *Muscardinus avellanarius* in the Tatra Mountains and the Sub-Tatra region. *Chrońmy Przyrodę Ojczystą*, 68: 91–99
514. Weber JM, Weissbrodt M (1999) Feeding habits of the Eurasian lynx in the Swiss Jura Mountains determined by faecal analysis. *Acta Theriol* 44:333–336
515. Weber D. 1989 The diet of polecats (*Mustela putorius* L.) in Switzerland. *Z. Säugetierkd.* 54, 157– 171.
516. Wiącek J., Polak M., Niedźwiedź M., Kowalczyk S. 2008. Zimowy skład pokarmu uszatki *Asio otus* w Lublinie. W: Indykiewicz P., Jerzak L., Barczak T. (red.). *Fauna miast. Ochronić różnorodność biologiczną w miastach. SAR „Pomorze”, Bydgoszcz.*
517. Wiącek J., Niedźwiedź M., Kowalczyk S., Piskorski M. 2009. Skład pokarmu puszczyka *Strix aluco* na wybranych stanowiskach Lubelszczyzny. W: Wiącek J., Polak M., Kucharczyk M., Grzywaczewski G., Jerzak L. *Ptaki – Środowisko – Zagrożenia – Ochrona. Wybrane aspekty ekologii ptaków. Lubelskie Towarzystwo Ornitologiczne, Lublin: 115–124*
518. Wiącek J., Polak M. & Niedźwiedź M. 2009: The diet composition of the tawny owl *Strix aluco* in the Kozłówka forest (eastern Poland). *Annales UMCS Sec. C* 64 (2): 75–81.
519. Wise, M.H., Linn, I.J. & Kennedy, C.R. (1981) A comparison of the feeding biology of mink *Mustela vison* and otter *Lutra lutra*. *Journal of Zoology*, 195, 181–213.
520. Woods M., McDonald R.A. & Harris S. 2003. Predation of wildlife by domestic cats *Felis catus* in Great Britain. *Mammal Review*, 33: 174–188.
521. Yatsiuk, Y. & Filatova, Y. 2017. Seasonal changes in Tawny Owl (*Strix aluco*) diet in an oak forest in Eastern Ukraine. *Turk. J. Zool.* 41: 130–137.

522. Yatsiuk YA (2011). Variability of the Tawny Owl (*Strix aluco*) winter and spring diet in a forest-steppe oak forest. *Zoologicheskii Zhurnal* 90: 1483-1491.
523. Zang H, Kunze P (1978). Zur Ernährung des Rauhfusskauzes (*Aegolius funereus*) im Harz mit einer Bemerkung zur Gefährdung durch Eichhörnchen (*Sciurus vulgaris*). *Vogelkd Ber Niedersachsen* 2: 41-44
524. Zarco, V., Talabante, C., Viejo, J. L. (2016). La dieta del búho real en el centro peninsular. *Quercus*, 364: 24-29.
525. Zárybnická M (2009b) Activity patterns of male Tengmalm's Owls, *Aegolius funereus* under varying food conditions. *Folia Zool* 58:104–112.
526. Zárybnická M., Sedláček O. & Korpimäki E. 2009. Do Tengmalm's owls alter parental feeding effort under varying conditions of main prey availability? *Journal of Ornithology*, 150: 231–237.
527. Zárybnická M, Riegert J, Štastný K (2011). Tengmalm's Owl diet composition: a comparison of camera surveillance and pellet analysis. *Ornis Fennica* 88: 147-153.
528. Zárybnická M., Riegert J. & Štastný J. 2013. The role of *Apodemus* mice and *Microtus* voles in the diet of the Tengmalm's owl in Central Europe. *Population Ecology*, 55: 353–361.
529. Zárybnická M, Kloubec B, Obuch J, Riegert J (2015a) Fledgling productivity in relation to diet composition of boreal owl *Aegolius funereus* in Central Europe. *Ardeola* 62:163–171
530. Zárybnická M., Riegert J., Kloubec B. & Obuch J. (2017) The effect of elevation and habitat cover on nest box occupancy and diet composition of Boreal Owls *Aegolius funereus*. *Bird Study*, 64 (2), 222-231.
531. Zima J, Obuch J, Kopcová-Klodová G, Kovařík M & Gaisler J 1998: Hmyzožravci a hlodavci Moravského krasu a přilehlých oblastí Dražanské vrchoviny [Insectivores and rodents of Moravian karst and surrounding areas (Czech Republic)]. *Lynx*, n.s. 29: 77–94.
532. Ziomek J. 1998. Drobne ssaki (Micromammalia) Roztocza. Część I. Micromammalia wybranych biotopów Roztocza Środkowego [Small mammals (Micromammalia) of the Roztocze. Part II. Micromammalia of the selected biotopes in Central Roztocze Upland]. *Fragm. Faun.* 41: 93–123.
533. Żmihorski M. & Osojca G. 2006. Diet of the tawny owl (*Strix aluco*) in the Romincka Forest (North East Poland). *Acta Zoologica Lituanica*, 16: 54–60.
534. Żmihorski M., Gryz J., Krauze-Gryz D., Olczyk A. & Osojca G. 2011. The tawny owl *Strix aluco* as a material collector in faunistic investigations: the case study of small mammals in NE Poland. *Acta Zoologica Lituanica*, 21: 185–191.
535. Zvářal K & Obuch J 1996: Porovnanie troch spôsobov zisťovania potravy sovy obyčajnej (*Strix aluco*) na Zlínsku [A comparison of three types of acquirements of data on the diet of tawny owl (*Strix aluco*) in the Zlín Region]. *Buteo* 8: 119–122.
